# Supplementary material for: Molecular Docking and Molecular Dynamics Studies Reveal Secretory Proteins as Novel Targets of Temozolomide in Glioblastoma Multiforme
Source: MDPI journal article supplement (doi:10.3390/molecules27217198), 2022-10-24
Supplement: s1 [file s1]

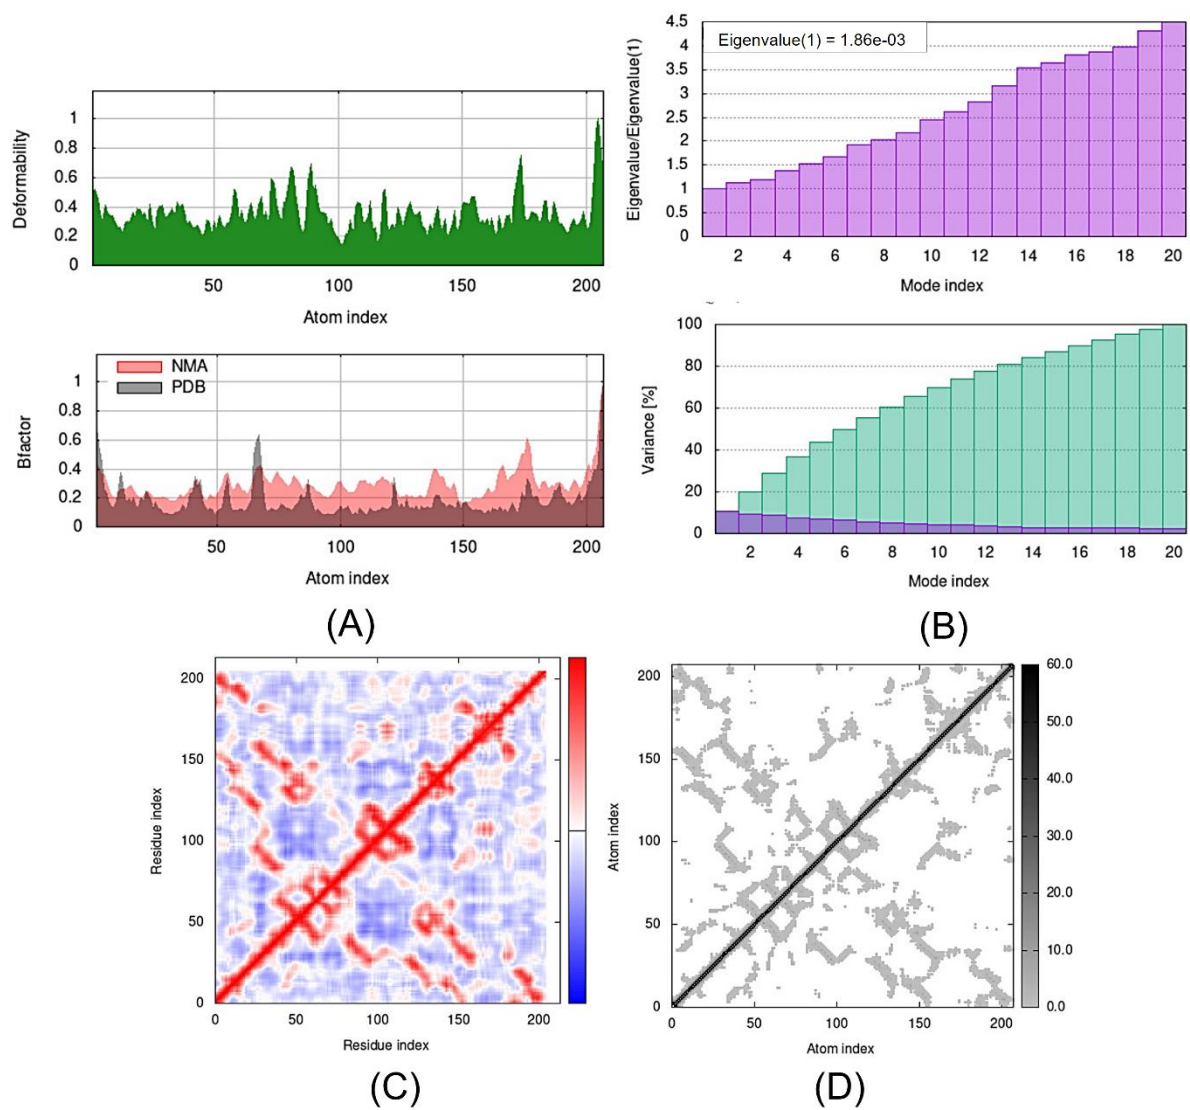

Figure S1. Eigenvalue and variance graphs of NPTX1-TMZ.

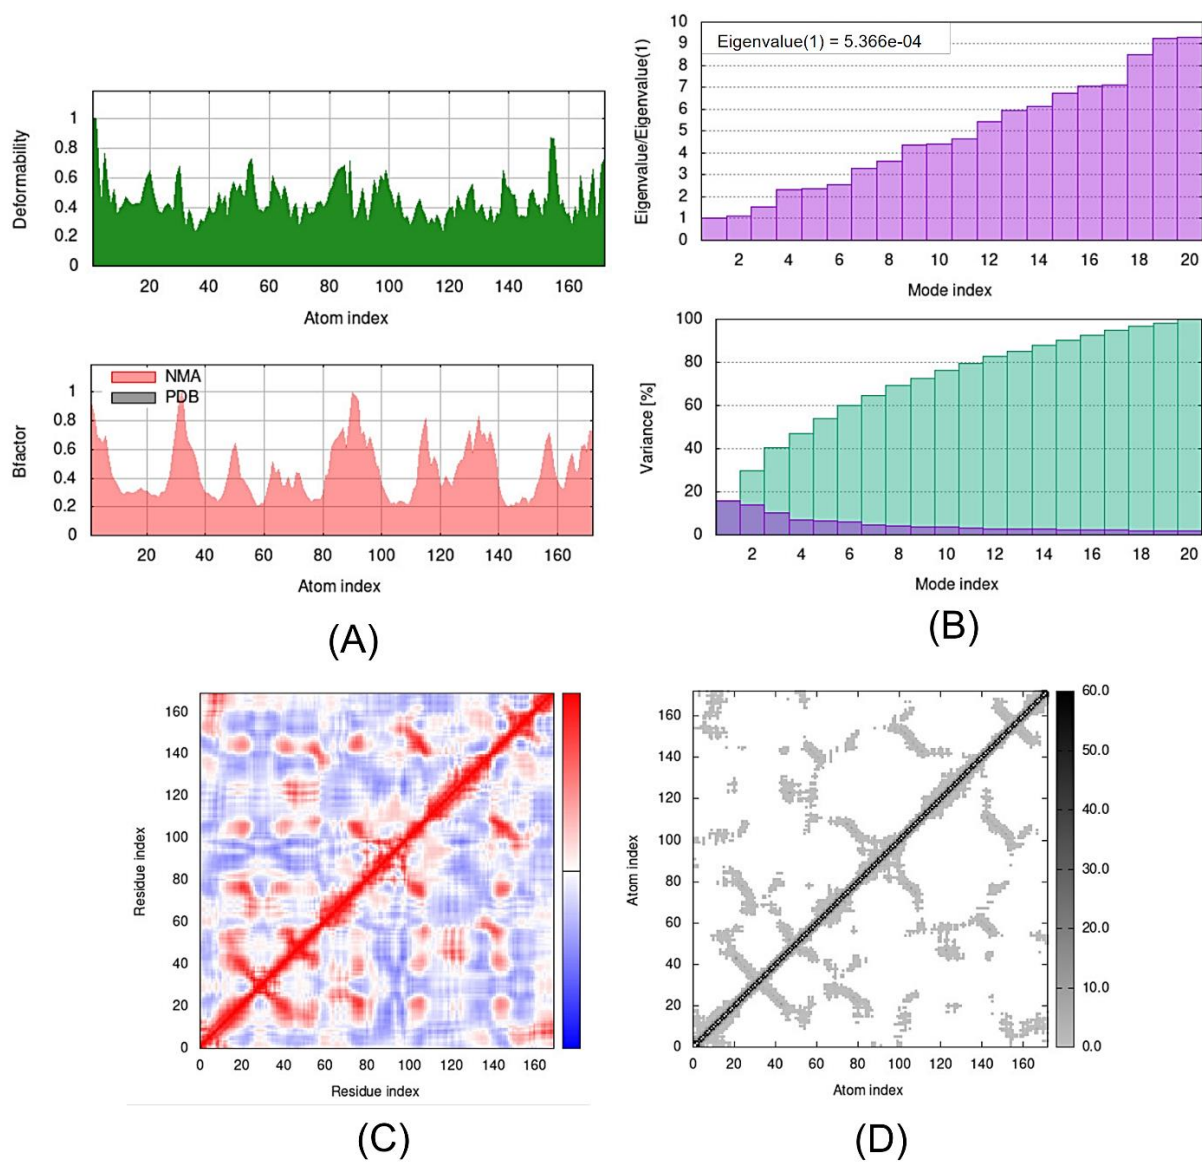

**Figure S2.** Eigenvalue and variance graphs of CREG2-TMZ.

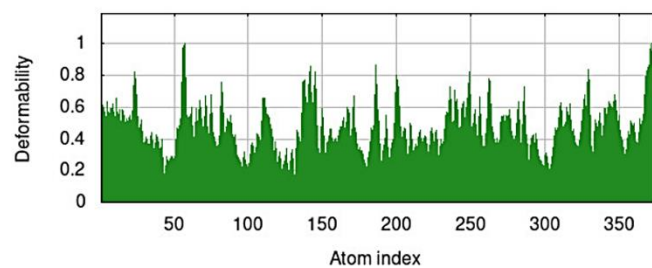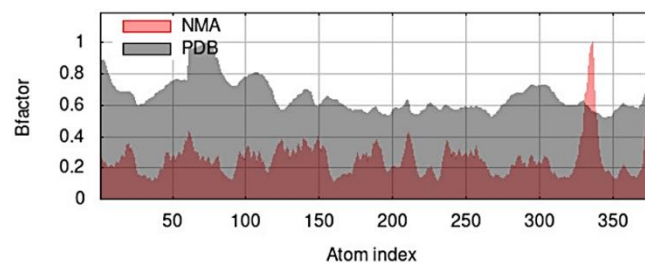

(A)

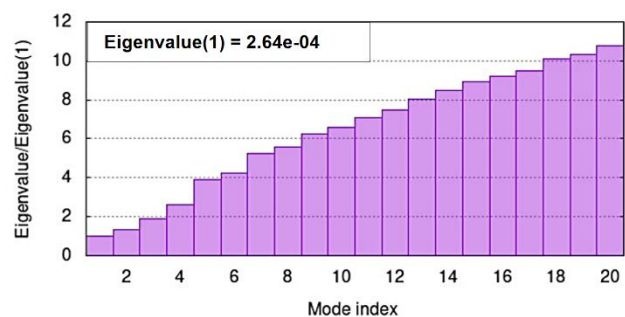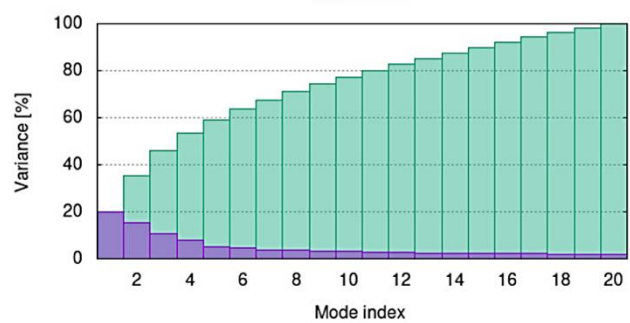

(B)

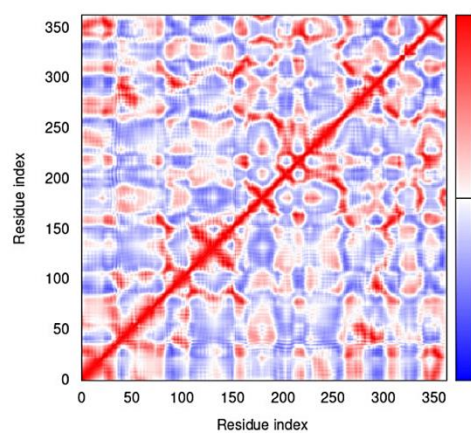

(C)

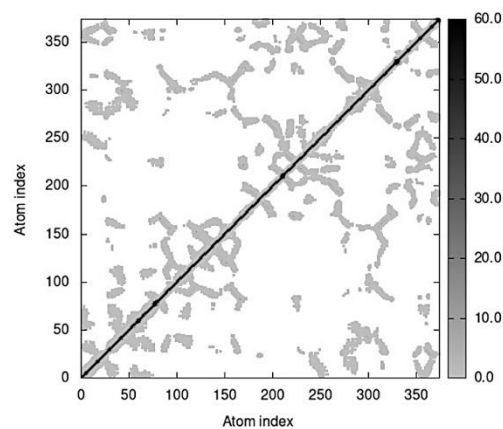

(D)

**Figure S3.** Eigenvalue and variance graphs of SERPINI1-TMZ.

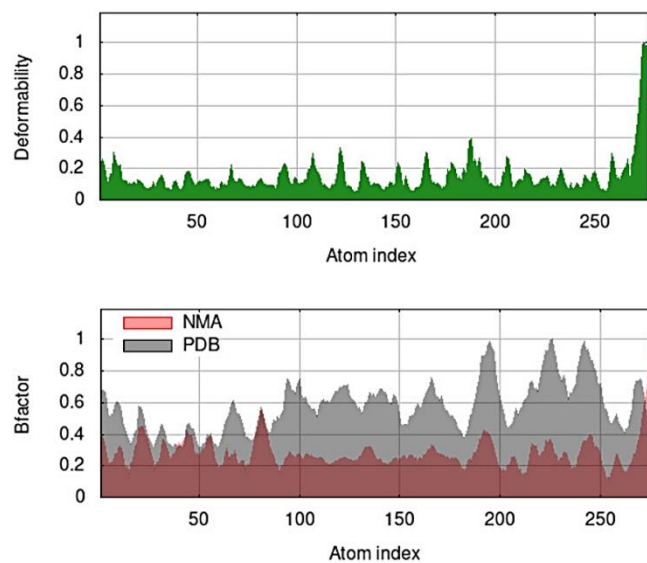

(A)

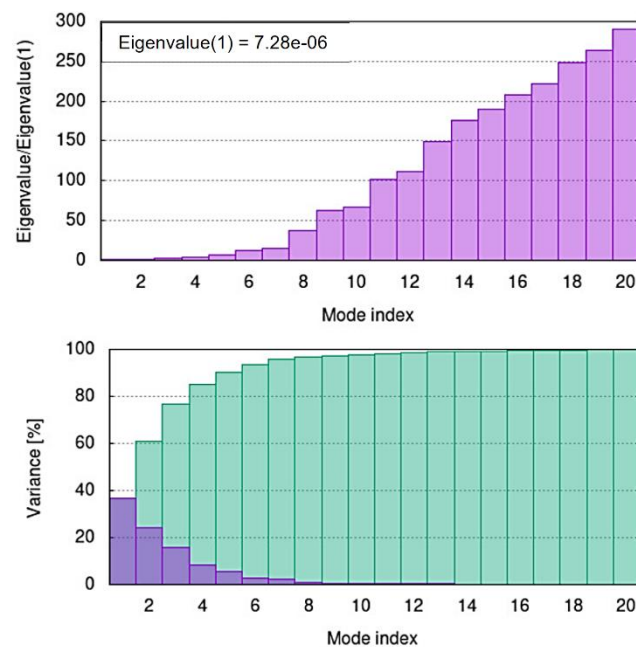

(B)

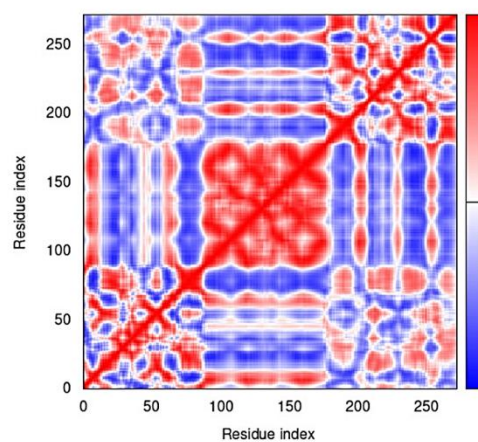

(C)

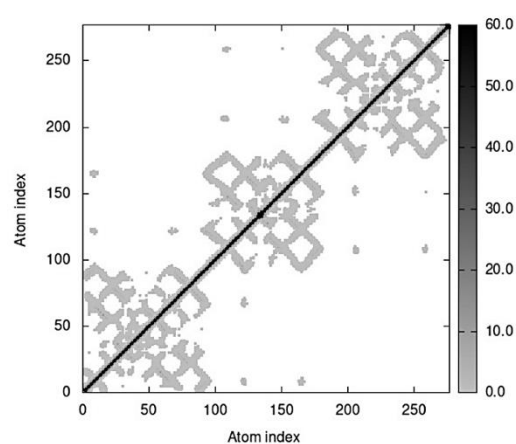

(D)

**Figure S4.** Eigenvalue and variance graphs of OPCML-TMZ.



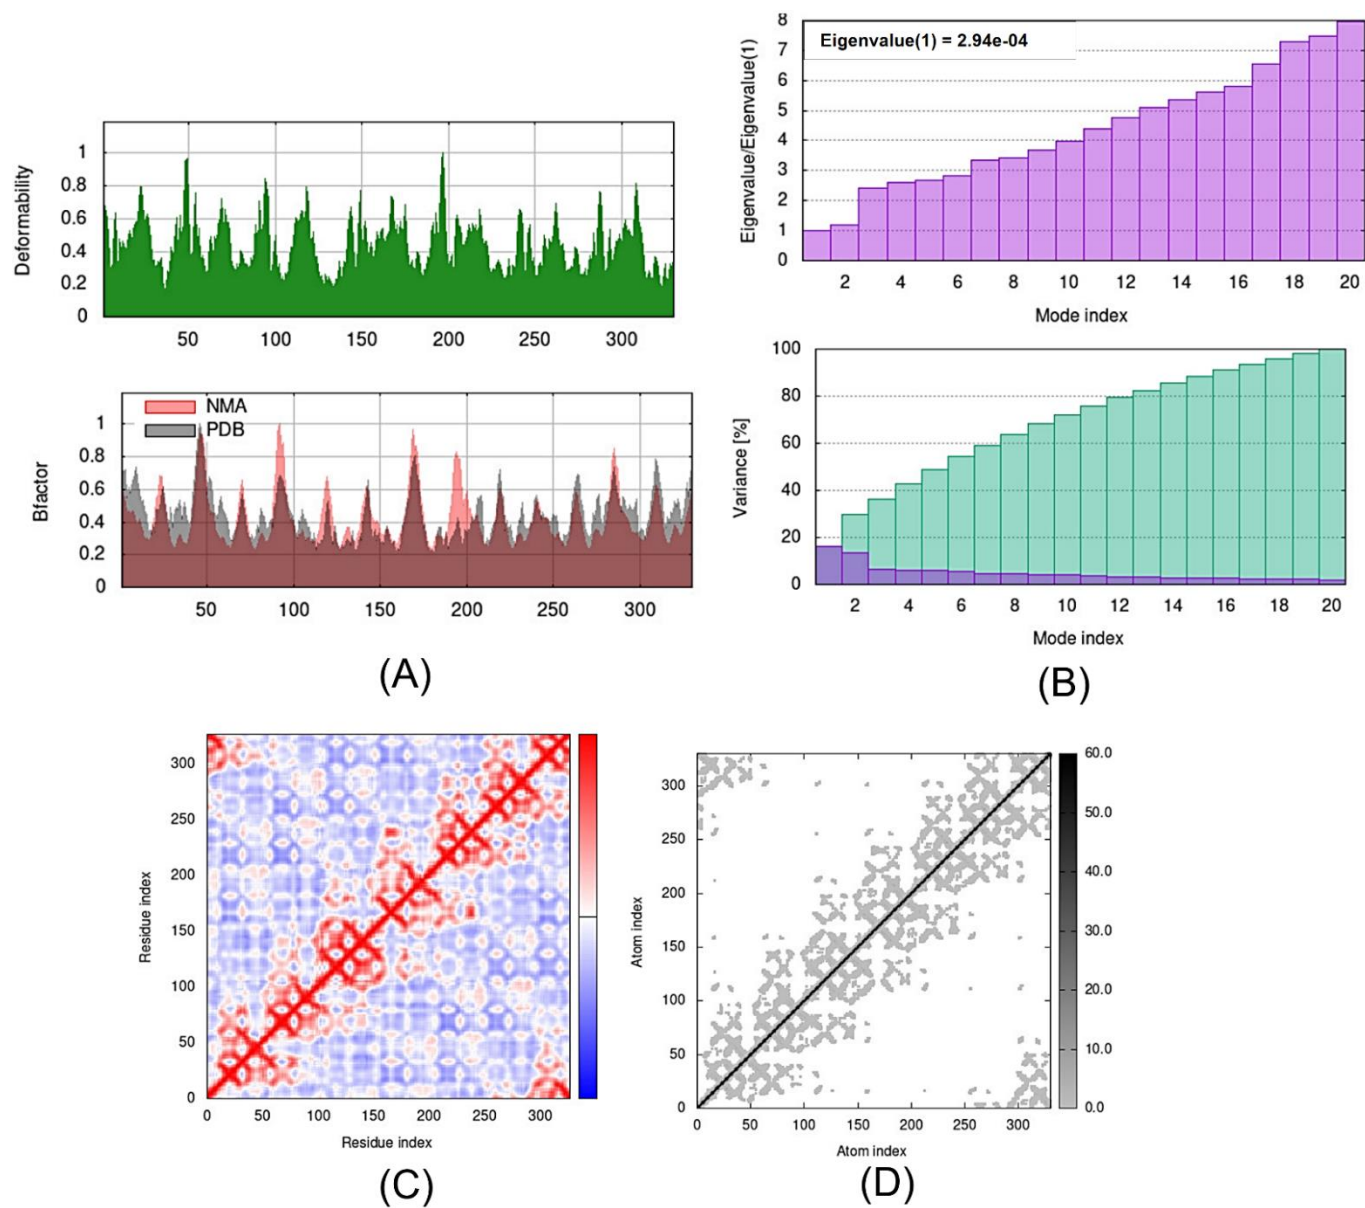

**Figure S5.** Eigenvalue and variance graphs of LGI1-TMZ.

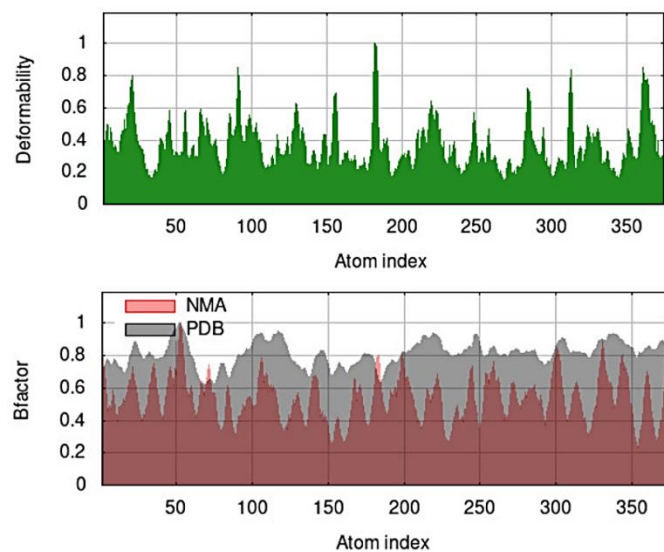

(A)

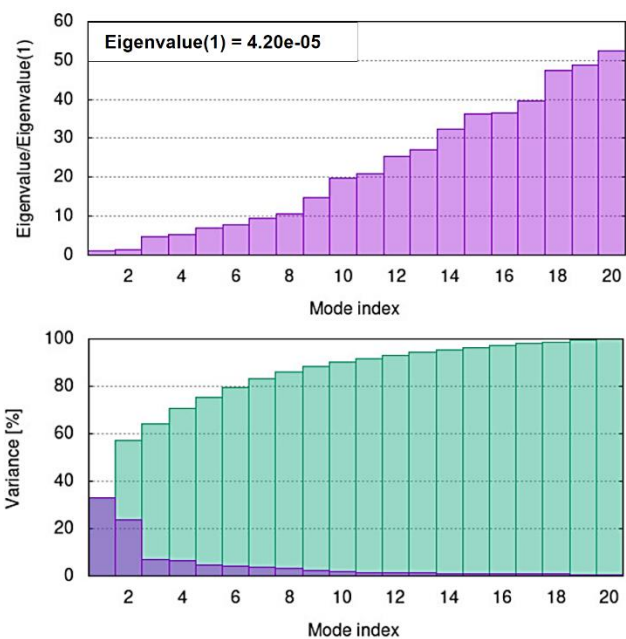

(B)

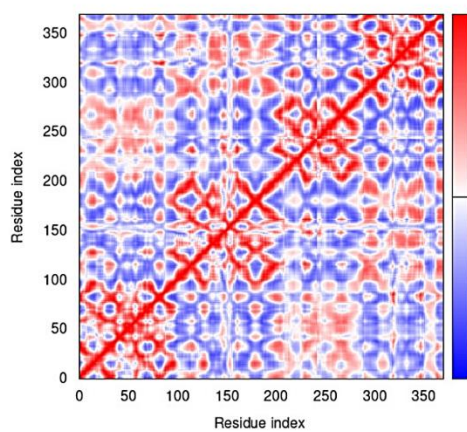

(C)

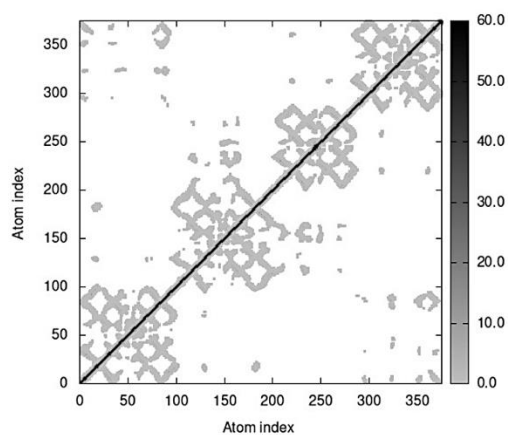

(D)

**Figure S6.** Eigenvalue and variance graphs of CNTN2-TMZ.

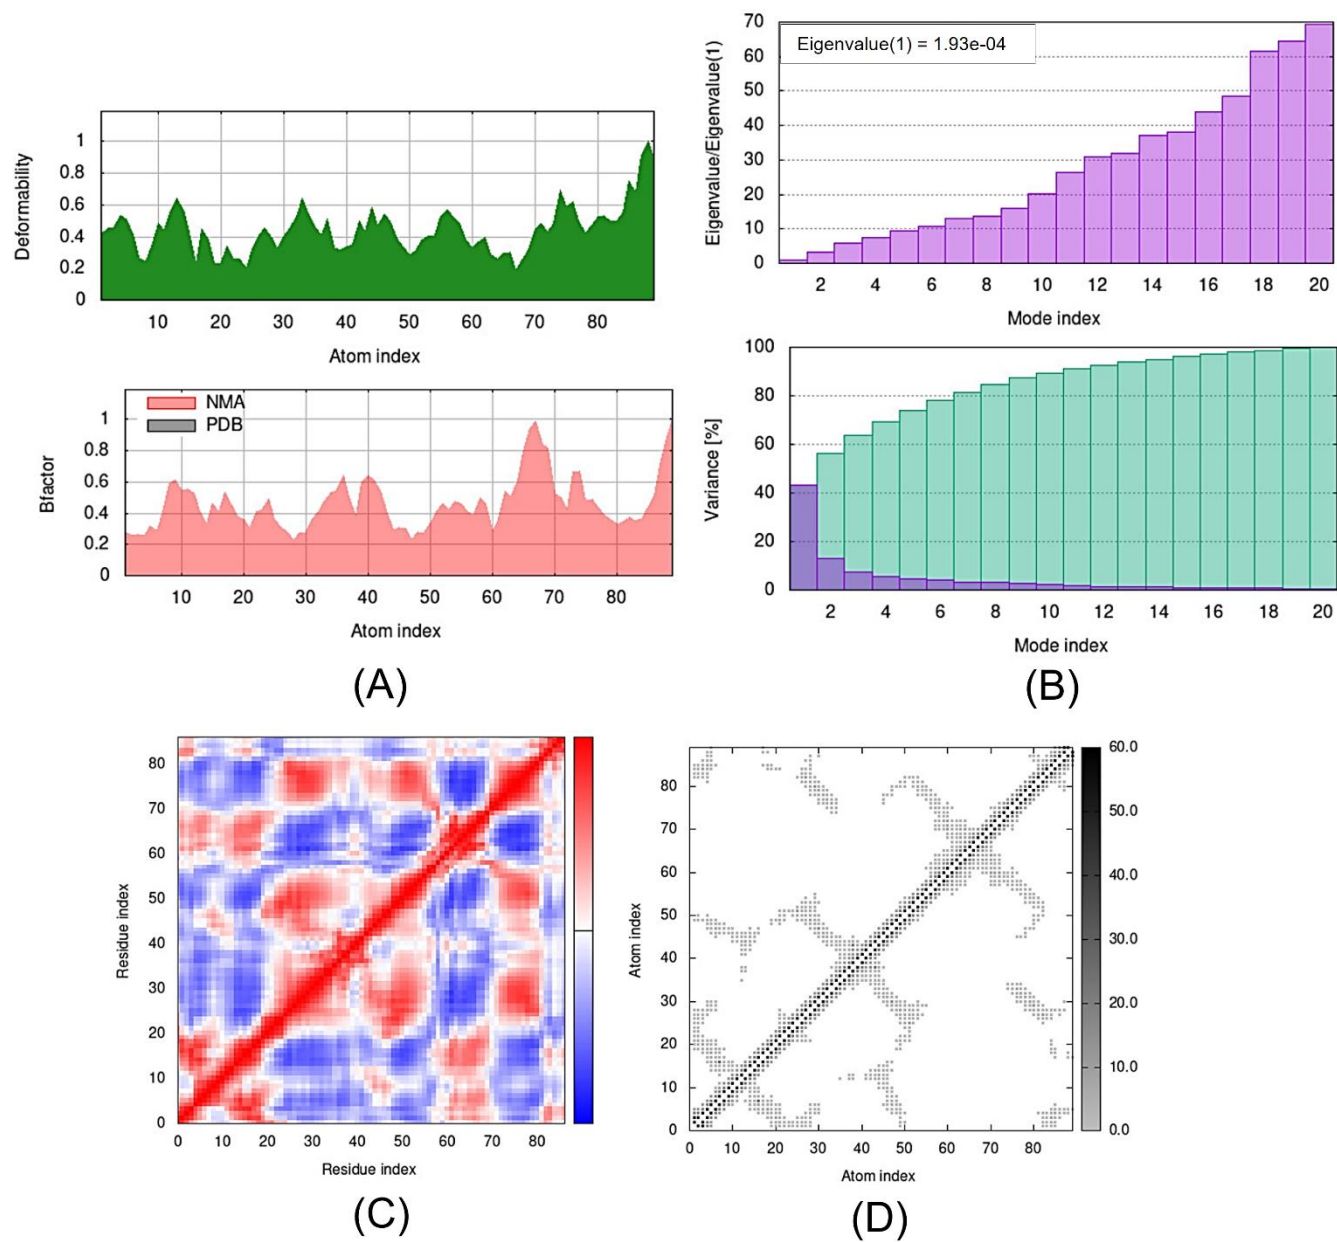

**Figure S7.** Eigenvalue and variance graphs of LY6H-TMZ.

**Supplementary Table S1: RMSF Values Profile of SLIT1**

| <i>Residue No.</i> | <i>Chain</i> | <i>RMSF Value</i> |
|--------------------|--------------|-------------------|
| 35                 | A            | 4.801             |
| 36                 | A            | 3.645             |
| 37                 | A            | 3.922             |
| 38                 | A            | 3.49              |
| 39                 | A            | 2.512             |
| 40                 | A            | 2.613             |
| 41                 | A            | 1.818             |

|    |   |       |
|----|---|-------|
| 42 | A | 1.609 |
| 43 | A | 1.494 |
| 44 | A | 1.118 |
| 45 | A | 0.846 |
| 46 | A | 0.742 |
| 47 | A | 0.766 |
| 48 | A | 1.594 |
| 49 | A | 1.907 |
| 50 | A | 1.648 |
| 51 | A | 1.988 |
| 52 | A | 1.897 |
| 53 | A | 1.843 |
| 54 | A | 2.452 |
| 55 | A | 2.039 |
| 56 | A | 1.972 |
| 57 | A | 2.437 |
| 58 | A | 1.66  |
| 59 | A | 1.504 |
| 60 | A | 1.608 |
| 61 | A | 2.024 |
| 62 | A | 2.001 |
| 63 | A | 2.004 |
| 64 | A | 0.717 |
| 65 | A | 0.45  |
| 66 | A | 0.321 |
| 67 | A | 0.456 |
| 68 | A | 0.405 |
| 69 | A | 0.665 |
| 70 | A | 0.491 |
| 71 | A | 0.374 |
| 72 | A | 0.132 |
| 73 | A | 0.402 |
| 74 | A | 0.924 |
| 75 | A | 1.842 |
| 76 | A | 2.033 |
| 77 | A | 3.179 |
| 78 | A | 3.515 |
| 79 | A | 2.799 |
| 80 | A | 2.351 |
| 81 | A | 1.371 |
| 82 | A | 1.602 |
| 83 | A | 1.195 |
| 84 | A | 1.332 |
| 85 | A | 1.808 |
| 86 | A | 0.977 |
| 87 | A | 0.994 |



|     |   |       |
|-----|---|-------|
| 88  | A | 0.457 |
| 89  | A | 0.383 |
| 90  | A | 0.303 |
| 91  | A | 0.408 |
| 92  | A | 0.245 |
| 93  | A | 0.284 |
| 94  | A | 0.198 |
| 95  | A | 0.213 |
| 96  | A | 0.209 |
| 97  | A | 0.689 |
| 98  | A | 1.483 |
| 99  | A | 1.481 |
| 100 | A | 1.714 |
| 101 | A | 1.452 |
| 102 | A | 1.453 |
| 103 | A | 1.674 |
| 104 | A | 1.377 |
| 105 | A | 0.904 |
| 106 | A | 0.934 |
| 107 | A | 1.064 |
| 108 | A | 1.113 |
| 109 | A | 0.895 |
| 110 | A | 0.905 |
| 111 | A | 1.39  |
| 112 | A | 1.594 |
| 113 | A | 1.49  |
| 114 | A | 1.647 |
| 115 | A | 1.327 |
| 116 | A | 1.32  |
| 117 | A | 1.188 |
| 118 | A | 1.033 |
| 119 | A | 1.394 |
| 120 | A | 2.282 |
| 121 | A | 1.911 |
| 122 | A | 1.756 |
| 123 | A | 0.943 |
| 124 | A | 0.92  |
| 125 | A | 0.947 |
| 126 | A | 1.089 |
| 127 | A | 1.529 |
| 128 | A | 1.668 |
| 129 | A | 1.158 |
| 130 | A | 2.574 |
| 131 | A | 2.561 |
| 132 | A | 2.742 |
| 133 | A | 1.431 |

|     |   |       |
|-----|---|-------|
| 134 | A | 1.401 |
| 135 | A | 0.323 |
| 136 | A | 0.187 |
| 137 | A | 0.077 |
| 138 | A | 0.166 |
| 139 | A | 0.185 |
| 140 | A | 0.256 |
| 141 | A | 0.359 |
| 142 | A | 0.361 |
| 143 | A | 0.681 |
| 144 | A | 0.959 |
| 145 | A | 2.093 |
| 146 | A | 1.819 |
| 147 | A | 2.616 |
| 148 | A | 1.138 |
| 149 | A | 1.675 |
| 150 | A | 0.901 |
| 151 | A | 0.731 |
| 152 | A | 0.582 |
| 153 | A | 0.594 |
| 154 | A | 0.601 |
| 155 | A | 1.724 |
| 156 | A | 1.809 |
| 157 | A | 1.115 |
| 158 | A | 0.933 |
| 159 | A | 0.239 |
| 160 | A | 0.127 |
| 161 | A | 0.075 |
| 162 | A | 0.099 |
| 163 | A | 0.095 |
| 164 | A | 0.573 |
| 165 | A | 0.496 |
| 166 | A | 0.695 |
| 167 | A | 0.793 |
| 168 | A | 1.337 |
| 169 | A | 1.098 |
| 170 | A | 1.767 |
| 171 | A | 1.218 |
| 172 | A | 1.141 |
| 173 | A | 1.485 |
| 174 | A | 2.005 |
| 175 | A | 3.336 |
| 176 | A | 3.619 |
| 177 | A | 1.656 |
| 178 | A | 1.848 |
| 179 | A | 0.892 |

|     |   |       |
|-----|---|-------|
| 180 | A | 0.618 |
| 181 | A | 0.635 |
| 182 | A | 0.505 |
| 183 | A | 0.353 |
| 184 | A | 0.398 |
| 185 | A | 0.168 |
| 186 | A | 0.091 |
| 187 | A | 0.089 |
| 188 | A | 0.232 |
| 189 | A | 0.291 |
| 190 | A | 0.271 |
| 191 | A | 0.711 |
| 192 | A | 2.18  |
| 193 | A | 2.24  |
| 194 | A | 3.107 |
| 195 | A | 4.658 |
| 196 | A | 4.603 |
| 197 | A | 4.546 |
| 198 | A | 2.843 |
| 199 | A | 2.465 |
| 200 | A | 1.842 |
| 201 | A | 2.209 |
| 202 | A | 1.018 |
| 203 | A | 1.087 |
| 204 | A | 0.882 |
| 205 | A | 1.313 |
| 206 | A | 2.018 |
| 207 | A | 1.943 |
| 208 | A | 2.184 |
| 209 | A | 1.154 |
| 210 | A | 0.948 |
| 211 | A | 0.993 |
| 212 | A | 0.869 |
| 213 | A | 0.781 |
| 214 | A | 0.986 |
| 215 | A | 0.878 |
| 291 | A | 0.428 |
| 292 | A | 0.614 |
| 293 | A | 0.409 |
| 294 | A | 0.381 |
| 295 | A | 0.391 |
| 296 | A | 0.598 |
| 297 | A | 0.707 |
| 298 | A | 0.71  |
| 299 | A | 0.95  |
| 300 | A | 1.102 |

|     |   |       |
|-----|---|-------|
| 301 | A | 1.682 |
| 302 | A | 2.497 |
| 303 | A | 1.104 |
| 304 | A | 1.745 |
| 305 | A | 1.183 |
| 306 | A | 0.911 |
| 307 | A | 1.078 |
| 308 | A | 1.255 |
| 309 | A | 1.276 |
| 310 | A | 0.736 |
| 311 | A | 0.536 |
| 312 | A | 0.557 |
| 313 | A | 0.427 |
| 314 | A | 0.274 |
| 315 | A | 0.67  |
| 316 | A | 0.427 |
| 317 | A | 0.489 |
| 318 | A | 0.842 |
| 319 | A | 0.841 |
| 320 | A | 1.155 |
| 321 | A | 1.094 |
| 322 | A | 1.368 |
| 323 | A | 1.201 |
| 324 | A | 1.03  |
| 325 | A | 1.201 |
| 326 | A | 1.255 |
| 327 | A | 0.866 |
| 328 | A | 0.72  |
| 329 | A | 0.505 |
| 330 | A | 0.669 |
| 331 | A | 0.655 |
| 332 | A | 0.485 |
| 333 | A | 0.756 |
| 334 | A | 0.667 |
| 335 | A | 0.548 |
| 336 | A | 0.418 |
| 337 | A | 0.511 |
| 338 | A | 0.335 |
| 339 | A | 0.606 |
| 340 | A | 0.552 |
| 341 | A | 1.312 |
| 342 | A | 0.543 |
| 343 | A | 0.661 |
| 344 | A | 1.145 |
| 345 | A | 1.302 |
| 346 | A | 1.671 |

|     |   |       |
|-----|---|-------|
| 347 | A | 1.015 |
| 348 | A | 1.698 |
| 349 | A | 2.169 |
| 350 | A | 3.685 |
| 351 | A | 4.561 |
| 352 | A | 3.903 |
| 353 | A | 2.744 |
| 354 | A | 3.164 |
| 355 | A | 3.32  |
| 356 | A | 2.827 |
| 357 | A | 1.928 |
| 358 | A | 2.746 |
| 359 | A | 2.045 |
| 360 | A | 1.733 |
| 361 | A | 1.458 |
| 362 | A | 1.155 |
| 363 | A | 0.829 |
| 364 | A | 0.988 |
| 365 | A | 0.935 |
| 366 | A | 1.201 |
| 367 | A | 1.424 |
| 399 | A | 2.514 |
| 400 | A | 1.71  |
| 401 | A | 1.345 |
| 402 | A | 2.045 |
| 403 | A | 1.65  |
| 404 | A | 0.699 |
| 405 | A | 1.524 |
| 406 | A | 0.418 |
| 407 | A | 0.354 |
| 408 | A | 0.181 |
| 409 | A | 0.093 |
| 410 | A | 0.323 |
| 411 | A | 0.656 |
| 412 | A | 0.704 |
| 413 | A | 0.766 |
| 414 | A | 0.756 |
| 415 | A | 1.409 |
| 416 | A | 1.542 |
| 417 | A | 2.395 |
| 418 | A | 1.887 |
| 419 | A | 1.677 |
| 420 | A | 1.53  |
| 421 | A | 1.46  |
| 422 | A | 1.218 |
| 423 | A | 1.41  |



|     |   |       |
|-----|---|-------|
| 424 | A | 1.111 |
| 425 | A | 0.83  |
| 426 | A | 1.36  |
| 427 | A | 2.485 |
| 428 | A | 2.064 |
| 429 | A | 1.952 |
| 430 | A | 0.987 |
| 431 | A | 0.451 |
| 432 | A | 0.499 |
| 433 | A | 0.221 |
| 434 | A | 0.099 |
| 435 | A | 0.24  |
| 436 | A | 0.491 |
| 437 | A | 0.617 |
| 438 | A | 0.69  |
| 439 | A | 0.705 |
| 440 | A | 0.877 |
| 441 | A | 1.673 |
| 442 | A | 1.181 |
| 443 | A | 0.932 |
| 444 | A | 0.63  |
| 445 | A | 0.387 |
| 446 | A | 0.303 |
| 447 | A | 0.361 |
| 448 | A | 0.382 |
| 449 | A | 0.126 |
| 450 | A | 0.417 |
| 451 | A | 0.575 |
| 452 | A | 0.457 |
| 453 | A | 0.635 |
| 454 | A | 0.903 |
| 455 | A | 0.649 |
| 456 | A | 2.203 |
| 457 | A | 1.821 |
| 458 | A | 0.958 |
| 459 | A | 1.411 |
| 460 | A | 1.836 |
| 461 | A | 1.874 |
| 462 | A | 1.989 |
| 463 | A | 2.65  |
| 464 | A | 1.907 |
| 465 | A | 0.822 |
| 466 | A | 0.809 |
| 467 | A | 0.322 |
| 468 | A | 0.371 |
| 469 | A | 0.124 |

|     |   |       |
|-----|---|-------|
| 470 | A | 0.05  |
| 471 | A | 0.051 |
| 472 | A | 0.055 |
| 473 | A | 0.694 |
| 474 | A | 1.341 |
| 475 | A | 1.795 |
| 476 | A | 2.246 |
| 477 | A | 1.629 |
| 478 | A | 1.046 |
| 479 | A | 0.882 |
| 480 | A | 0.899 |
| 481 | A | 1.015 |
| 482 | A | 1.192 |
| 483 | A | 1.143 |
| 484 | A | 1.538 |
| 485 | A | 1.103 |
| 486 | A | 1.212 |
| 487 | A | 1.221 |
| 488 | A | 0.976 |
| 489 | A | 0.966 |
| 490 | A | 1.492 |
| 491 | A | 1.298 |
| 492 | A | 2.3   |
| 493 | A | 1.602 |
| 494 | A | 1.407 |
| 495 | A | 0.652 |
| 496 | A | 0.541 |
| 497 | A | 0.461 |
| 498 | A | 0.345 |
| 499 | A | 0.098 |
| 500 | A | 0.048 |
| 501 | A | 0.05  |
| 502 | A | 0.052 |
| 503 | A | 0.53  |
| 504 | A | 0.575 |
| 505 | A | 0.674 |
| 506 | A | 0.723 |
| 507 | A | 0.802 |
| 508 | A | 0.846 |
| 509 | A | 0.92  |
| 510 | A | 1.184 |
| 511 | A | 0.877 |
| 512 | A | 0.603 |
| 513 | A | 0.932 |
| 514 | A | 0.874 |
| 515 | A | 0.741 |

|     |   |       |
|-----|---|-------|
| 516 | A | 1.389 |
| 517 | A | 1.194 |
| 518 | A | 1.428 |
| 519 | A | 1.688 |
| 520 | A | 1.609 |
| 521 | A | 1.057 |
| 522 | A | 0.946 |
| 523 | A | 0.318 |
| 524 | A | 0.057 |
| 525 | A | 0.05  |
| 526 | A | 0.354 |
| 527 | A | 1.212 |
| 528 | A | 1.098 |
| 529 | A | 1.9   |
| 530 | A | 2.505 |
| 531 | A | 2.249 |
| 532 | A | 1.663 |
| 533 | A | 1.125 |
| 534 | A | 1.169 |
| 557 | A | 1.23  |
| 558 | A | 1.408 |
| 559 | A | 1.643 |
| 560 | A | 1.393 |
| 561 | A | 1.342 |
| 562 | A | 1.853 |
| 563 | A | 1.956 |
| 564 | A | 1.242 |
| 565 | A | 1.7   |
| 566 | A | 1.202 |
| 567 | A | 0.638 |
| 568 | A | 0.386 |
| 569 | A | 0.059 |
| 570 | A | 0.095 |
| 571 | A | 0.046 |
| 572 | A | 0.218 |
| 573 | A | 0.045 |
| 574 | A | 0.046 |
| 575 | A | 0.047 |
| 576 | A | 0.046 |
| 577 | A | 0.044 |
| 578 | A | 0.534 |
| 579 | A | 0.94  |
| 580 | A | 1.717 |
| 581 | A | 2.008 |
| 582 | A | 2.101 |
| 583 | A | 1.555 |

|     |   |       |
|-----|---|-------|
| 584 | A | 0.992 |
| 585 | A | 0.992 |
| 586 | A | 2.674 |
| 587 | A | 2.575 |
| 588 | A | 2.336 |
| 589 | A | 2.833 |
| 590 | A | 3.106 |
| 591 | A | 1.353 |
| 592 | A | 0.92  |
| 593 | A | 0.263 |
| 594 | A | 0.049 |
| 595 | A | 0.045 |
| 596 | A | 0.046 |
| 597 | A | 0.045 |
| 598 | A | 0.046 |
| 599 | A | 0.049 |
| 600 | A | 0.052 |
| 601 | A | 0.783 |
| 602 | A | 0.921 |
| 603 | A | 1.255 |
| 604 | A | 1.239 |
| 605 | A | 1.146 |
| 606 | A | 1.855 |
| 607 | A | 3.585 |
| 608 | A | 2.896 |
| 609 | A | 1.338 |
| 610 | A | 2.005 |
| 611 | A | 1.425 |
| 612 | A | 0.948 |
| 613 | A | 0.809 |
| 614 | A | 0.79  |
| 615 | A | 0.69  |
| 616 | A | 0.286 |
| 617 | A | 0.185 |
| 618 | A | 0.049 |
| 619 | A | 0.047 |
| 620 | A | 0.048 |
| 621 | A | 0.062 |
| 622 | A | 0.093 |
| 623 | A | 0.53  |
| 624 | A | 0.809 |
| 625 | A | 0.638 |
| 626 | A | 0.819 |
| 627 | A | 0.668 |
| 628 | A | 0.387 |
| 629 | A | 0.732 |

|     |   |       |
|-----|---|-------|
| 630 | A | 0.854 |
| 631 | A | 0.83  |
| 632 | A | 1.003 |
| 633 | A | 1.514 |
| 634 | A | 1.778 |
| 635 | A | 1.342 |
| 636 | A | 1.135 |
| 637 | A | 0.908 |
| 638 | A | 0.533 |
| 639 | A | 0.265 |
| 640 | A | 0.173 |
| 641 | A | 0.056 |
| 642 | A | 0.05  |
| 643 | A | 0.048 |
| 644 | A | 0.049 |
| 645 | A | 0.176 |
| 646 | A | 0.227 |
| 647 | A | 0.354 |
| 648 | A | 0.339 |
| 649 | A | 0.269 |
| 650 | A | 0.451 |
| 651 | A | 0.546 |
| 652 | A | 0.698 |
| 653 | A | 1.267 |
| 654 | A | 1.333 |
| 655 | A | 1.69  |
| 656 | A | 2.821 |
| 657 | A | 1.694 |
| 658 | A | 1.773 |
| 659 | A | 0.983 |
| 660 | A | 0.795 |
| 661 | A | 0.576 |
| 662 | A | 0.375 |
| 663 | A | 0.267 |
| 664 | A | 0.061 |
| 665 | A | 0.054 |
| 666 | A | 0.053 |
| 667 | A | 0.05  |
| 668 | A | 0.052 |
| 669 | A | 0.181 |
| 670 | A | 0.235 |
| 671 | A | 0.341 |
| 672 | A | 0.53  |
| 673 | A | 0.594 |
| 674 | A | 0.899 |
| 675 | A | 0.97  |



|     |   |       |
|-----|---|-------|
| 676 | A | 0.976 |
| 677 | A | 0.565 |
| 678 | A | 0.361 |
| 679 | A | 0.387 |
| 680 | A | 0.369 |
| 681 | A | 0.547 |
| 682 | A | 0.452 |
| 683 | A | 0.539 |
| 684 | A | 0.162 |
| 685 | A | 0.198 |
| 686 | A | 0.238 |
| 687 | A | 0.23  |
| 688 | A | 0.127 |
| 689 | A | 0.414 |
| 690 | A | 0.561 |
| 691 | A | 0.422 |
| 692 | A | 0.055 |
| 693 | A | 0.052 |
| 694 | A | 0.054 |
| 695 | A | 0.561 |
| 696 | A | 0.823 |
| 697 | A | 0.716 |
| 698 | A | 0.489 |
| 699 | A | 0.833 |
| 700 | A | 0.567 |
| 701 | A | 0.669 |
| 702 | A | 0.637 |
| 703 | A | 0.657 |
| 704 | A | 0.824 |
| 705 | A | 0.699 |
| 706 | A | 0.883 |
| 707 | A | 0.577 |
| 708 | A | 0.822 |
| 709 | A | 0.855 |
| 710 | A | 1.44  |
| 711 | A | 0.836 |
| 712 | A | 1.047 |
| 713 | A | 0.851 |
| 714 | A | 0.53  |
| 715 | A | 0.058 |
| 716 | A | 0.055 |
| 717 | A | 0.058 |
| 718 | A | 0.057 |
| 719 | A | 0.582 |
| 720 | A | 0.516 |
| 721 | A | 0.972 |

|     |   |       |
|-----|---|-------|
| 722 | A | 1.92  |
| 723 | A | 1.542 |
| 724 | A | 1.026 |
| 725 | A | 1.73  |
| 726 | A | 2.973 |
| 727 | A | 4.035 |
| 728 | A | 3.714 |
| 729 | A | 3.224 |
| 730 | A | 2.629 |
| 731 | A | 1.247 |
| 732 | A | 0.823 |
| 733 | A | 0.589 |
| 734 | A | 0.735 |
| 735 | A | 0.962 |
| 736 | A | 1.498 |
| 737 | A | 1.138 |
| 738 | A | 1.568 |
| 739 | A | 0.673 |
| 740 | A | 1.702 |
| 741 | A | 1.182 |
| 742 | A | 2.217 |
| 743 | A | 0.784 |
| 744 | A | 0.587 |
| 745 | A | 0.061 |
| 746 | A | 0.058 |
| 747 | A | 0.061 |
| 748 | A | 0.06  |
| 749 | A | 0.37  |
| 750 | A | 0.467 |
| 751 | A | 0.679 |
| 752 | A | 0.391 |
| 753 | A | 0.394 |
| 754 | A | 0.413 |
| 755 | A | 0.928 |
| 756 | A | 0.746 |
| 757 | A | 0.579 |
| 758 | A | 0.65  |
| 759 | A | 0.576 |
| 760 | A | 0.765 |
| 761 | A | 1.079 |
| 762 | A | 1.139 |
| 763 | A | 0.965 |
| 764 | A | 0.477 |
| 765 | A | 0.067 |
| 766 | A | 0.065 |
| 767 | A | 0.064 |

|     |   |       |
|-----|---|-------|
| 768 | A | 0.077 |
| 769 | A | 0.089 |
| 770 | A | 0.561 |
| 771 | A | 0.887 |
| 772 | A | 0.519 |
| 773 | A | 0.574 |
| 774 | A | 0.618 |
| 775 | A | 0.823 |
| 776 | A | 1.079 |
| 777 | A | 1.192 |
| 778 | A | 1.395 |
| 779 | A | 1.373 |
| 780 | A | 0.964 |
| 781 | A | 1.191 |
| 782 | A | 1.195 |
| 783 | A | 0.898 |
| 784 | A | 1.17  |
| 785 | A | 0.967 |
| 786 | A | 0.657 |
| 787 | A | 0.283 |
| 788 | A | 0.236 |
| 789 | A | 0.315 |
| 790 | A | 0.596 |
| 791 | A | 0.393 |
| 792 | A | 0.944 |
| 793 | A | 1.836 |
| 794 | A | 1.867 |
| 795 | A | 1.69  |
| 796 | A | 1.114 |
| 797 | A | 1.853 |
| 798 | A | 1.425 |
| 799 | A | 1.515 |
| 800 | A | 1.175 |
| 801 | A | 1.641 |
| 802 | A | 1.434 |
| 803 | A | 1.014 |
| 804 | A | 1.126 |
| 805 | A | 1.342 |
| 806 | A | 1.097 |
| 807 | A | 0.858 |
| 808 | A | 1.006 |
| 809 | A | 0.585 |
| 810 | A | 0.537 |
| 811 | A | 0.686 |
| 812 | A | 0.28  |
| 813 | A | 0.32  |

|     |   |       |
|-----|---|-------|
| 814 | A | 0.49  |
| 815 | A | 0.322 |
| 816 | A | 0.257 |
| 817 | A | 0.64  |
| 818 | A | 0.746 |
| 819 | A | 0.921 |
| 820 | A | 0.838 |
| 821 | A | 1.189 |
| 822 | A | 0.993 |
| 823 | A | 1.328 |
| 824 | A | 1.727 |
| 825 | A | 1.931 |
| 826 | A | 1.439 |
| 827 | A | 1.163 |
| 828 | A | 0.861 |
| 829 | A | 1.025 |
| 830 | A | 1.349 |
| 831 | A | 1.333 |
| 832 | A | 1.25  |
| 833 | A | 0.773 |
| 834 | A | 0.506 |
| 835 | A | 0.509 |
| 836 | A | 0.088 |
| 837 | A | 0.108 |
| 838 | A | 0.135 |
| 839 | A | 0.138 |
| 840 | A | 0.343 |
| 841 | A | 0.501 |
| 842 | A | 0.531 |
| 843 | A | 0.778 |
| 844 | A | 0.75  |
| 845 | A | 1.044 |
| 846 | A | 1.194 |
| 847 | A | 0.647 |
| 848 | A | 1.047 |
| 849 | A | 1.674 |
| 850 | A | 0.932 |
| 851 | A | 0.474 |
| 852 | A | 0.33  |
| 853 | A | 0.602 |
| 854 | A | 0.927 |
| 855 | A | 0.914 |
| 856 | A | 0.964 |
| 857 | A | 1.611 |
| 858 | A | 0.799 |
| 859 | A | 0.982 |

|     |   |       |
|-----|---|-------|
| 860 | A | 0.688 |
| 861 | A | 0.304 |
| 862 | A | 0.471 |
| 863 | A | 0.425 |
| 864 | A | 0.646 |
| 865 | A | 0.843 |
| 866 | A | 0.737 |
| 867 | A | 0.733 |
| 868 | A | 0.479 |
| 869 | A | 0.672 |
| 870 | A | 0.762 |
| 871 | A | 1.443 |
| 872 | A | 1.137 |
| 873 | A | 0.822 |
| 874 | A | 0.887 |
| 875 | A | 0.979 |
| 876 | A | 1.11  |
| 877 | A | 0.745 |
| 878 | A | 0.516 |
| 879 | A | 1.021 |
| 880 | A | 1.044 |
| 881 | A | 0.541 |
| 882 | A | 0.787 |
| 883 | A | 1.195 |
| 884 | A | 1.407 |
| 885 | A | 1.089 |
| 886 | A | 1.358 |
| 887 | A | 1.519 |
| 888 | A | 2.003 |
| 889 | A | 1.137 |
| 890 | A | 0.578 |
| 891 | A | 0.715 |
| 892 | A | 0.651 |
| 893 | A | 0.566 |
| 894 | A | 0.726 |
| 895 | A | 1.157 |
| 896 | A | 2.44  |
| 897 | A | 2.722 |
| 898 | A | 2.997 |
| 899 | A | 2.534 |
| 900 | A | 2.446 |
| 901 | A | 1.535 |
| 902 | A | 0.776 |
| 903 | A | 0.394 |
| 904 | A | 0.556 |
| 905 | A | 0.641 |



|     |   |       |
|-----|---|-------|
| 906 | A | 0.809 |
| 907 | A | 0.772 |
| 908 | A | 1.175 |
| 909 | A | 1.767 |
| 910 | A | 2.139 |
| 911 | A | 3.146 |
| 912 | A | 4.03  |
| 913 | A | 4.324 |
| 914 | A | 5.104 |
| 915 | A | 5.796 |
| 916 | A | 7.178 |
| 917 | A | 8.078 |

**Supplementary Table S2: RMSF Values Profile of GDF1**

| <i>Residue<br/>No.</i> | <i>Chain</i> | <i>RMSF Value</i> |
|------------------------|--------------|-------------------|
| 33                     | A            | 0.964             |
| 34                     | A            | 0.565             |
| 35                     | A            | 0.596             |
| 36                     | A            | 0.597             |
| 37                     | A            | 0.452             |
| 38                     | A            | 0.509             |
| 39                     | A            | 0.526             |
| 40                     | A            | 0.397             |
| 41                     | A            | 0.352             |
| 42                     | A            | 0.434             |
| 43                     | A            | 0.57              |
| 44                     | A            | 1.013             |
| 45                     | A            | 2.053             |
| 46                     | A            | 2.326             |
| 47                     | A            | 3.113             |
| 48                     | A            | 3.121             |
| 49                     | A            | 3.169             |
| 50                     | A            | 3.152             |
| 51                     | A            | 2.807             |
| 52                     | A            | 2.703             |
| 53                     | A            | 2.26              |
| 54                     | A            | 3.261             |
| 55                     | A            | 2.683             |
| 56                     | A            | 2.411             |
| 57                     | A            | 2.853             |
| 58                     | A            | 2.443             |
| 59                     | A            | 2.25              |
| 60                     | A            | 2.096             |

|     |   |       |
|-----|---|-------|
| 61  | A | 1.803 |
| 62  | A | 1.653 |
| 63  | A | 1.645 |
| 64  | A | 1.639 |
| 65  | A | 1.29  |
| 66  | A | 1.312 |
| 67  | A | 1.565 |
| 68  | A | 1.462 |
| 69  | A | 1.312 |
| 70  | A | 1.287 |
| 71  | A | 1.379 |
| 72  | A | 1.276 |
| 73  | A | 0.976 |
| 74  | A | 1.055 |
| 75  | A | 1.411 |
| 76  | A | 2.335 |
| 77  | A | 6.242 |
| 78  | A | 5.72  |
| 79  | A | 4.977 |
| 80  | A | 4.275 |
| 81  | A | 3.858 |
| 82  | A | 2.223 |
| 83  | A | 1.913 |
| 84  | A | 1.337 |
| 85  | A | 0.958 |
| 99  | A | 0.986 |
| 100 | A | 0.981 |
| 101 | A | 0.758 |
| 102 | A | 0.587 |
| 103 | A | 0.436 |
| 104 | A | 0.506 |
| 105 | A | 0.497 |
| 106 | A | 0.734 |
| 107 | A | 2.189 |
| 108 | A | 2.096 |
| 109 | A | 3.205 |
| 110 | A | 3.489 |
| 111 | A | 2.887 |
| 112 | A | 1.547 |
| 113 | A | 1.461 |
| 114 | A | 2.278 |
| 115 | A | 2.732 |
| 116 | A | 3.113 |
| 117 | A | 3.016 |
| 118 | A | 2.31  |
| 119 | A | 3.087 |

|     |   |       |
|-----|---|-------|
| 120 | A | 3.452 |
| 121 | A | 2.579 |
| 122 | A | 2.242 |
| 123 | A | 1.771 |
| 124 | A | 1.381 |
| 125 | A | 1.177 |
| 126 | A | 0.731 |
| 127 | A | 0.452 |
| 128 | A | 0.3   |
| 129 | A | 0.362 |
| 130 | A | 0.343 |
| 131 | A | 0.296 |
| 132 | A | 0.743 |
| 133 | A | 0.97  |
| 134 | A | 1.528 |
| 135 | A | 1.23  |
| 136 | A | 0.768 |
| 137 | A | 1.227 |
| 138 | A | 1.629 |
| 139 | A | 2.235 |
| 140 | A | 2.874 |
| 141 | A | 2.003 |
| 142 | A | 1.615 |
| 143 | A | 0.888 |
| 144 | A | 0.542 |
| 145 | A | 0.395 |
| 146 | A | 0.109 |
| 147 | A | 0.451 |
| 148 | A | 0.211 |
| 149 | A | 0.197 |
| 150 | A | 0.107 |
| 151 | A | 0.118 |
| 152 | A | 0.362 |
| 153 | A | 0.855 |
| 154 | A | 1.609 |
| 155 | A | 2.163 |
| 156 | A | 2.056 |
| 157 | A | 1.562 |
| 158 | A | 2.076 |
| 159 | A | 2.252 |
| 160 | A | 2.156 |
| 161 | A | 1.731 |
| 162 | A | 0.834 |
| 163 | A | 0.39  |
| 164 | A | 0.315 |
| 165 | A | 0.276 |

|     |   |       |
|-----|---|-------|
| 166 | A | 0.159 |
| 167 | A | 0.307 |
| 168 | A | 0.554 |
| 169 | A | 0.307 |
| 170 | A | 0.634 |
| 171 | A | 1.819 |
| 172 | A | 1.693 |
| 173 | A | 1.763 |
| 174 | A | 2.354 |
| 175 | A | 1.412 |
| 176 | A | 0.989 |
| 177 | A | 0.721 |
| 178 | A | 0.973 |
| 179 | A | 0.914 |
| 180 | A | 0.9   |
| 181 | A | 0.59  |
| 182 | A | 0.549 |
| 183 | A | 0.404 |
| 184 | A | 0.484 |
| 185 | A | 0.946 |
| 186 | A | 1.383 |
| 187 | A | 1.372 |
| 188 | A | 1.952 |
| 189 | A | 1.732 |
| 190 | A | 0.902 |
| 191 | A | 0.856 |
| 192 | A | 0.589 |
| 193 | A | 0.579 |
| 194 | A | 0.361 |
| 195 | A | 0.613 |
| 196 | A | 0.563 |
| 197 | A | 0.544 |
| 198 | A | 1.112 |
| 199 | A | 0.779 |
| 200 | A | 0.792 |
| 201 | A | 1.064 |
| 202 | A | 0.731 |
| 203 | A | 0.648 |
| 204 | A | 0.832 |
| 205 | A | 1.04  |
| 206 | A | 1.145 |
| 207 | A | 2.175 |
| 208 | A | 2.003 |
| 209 | A | 1.803 |
| 210 | A | 0.886 |
| 211 | A | 0.486 |

|     |   |       |
|-----|---|-------|
| 212 | A | 0.4   |
| 213 | A | 0.113 |
| 214 | A | 0.401 |
| 215 | A | 0.116 |
| 216 | A | 0.232 |
| 217 | A | 0.231 |
| 218 | A | 0.339 |
| 219 | A | 0.909 |
| 220 | A | 2.374 |
| 221 | A | 3.342 |
| 222 | A | 3.696 |
| 223 | A | 4.197 |
| 224 | A | 4.278 |
| 225 | A | 2.766 |
| 226 | A | 1.127 |
| 227 | A | 0.526 |
| 228 | A | 0.626 |
| 229 | A | 1.562 |
| 230 | A | 2.129 |
| 231 | A | 1.753 |
| 232 | A | 2.384 |
| 233 | A | 1.396 |
| 234 | A | 0.878 |
| 235 | A | 0.468 |
| 236 | A | 0.409 |
| 237 | A | 0.117 |
| 238 | A | 0.418 |
| 239 | A | 0.298 |
| 240 | A | 0.567 |
| 241 | A | 0.804 |
| 242 | A | 0.897 |
| 243 | A | 1.067 |
| 244 | A | 1.359 |
| 245 | A | 1.342 |
| 246 | A | 1.986 |
| 247 | A | 2.661 |
| 248 | A | 2.526 |
| 249 | A | 3.193 |
| 250 | A | 2.438 |
| 251 | A | 2.509 |
| 252 | A | 2.816 |
| 253 | A | 1.909 |
| 254 | A | 0.685 |
| 255 | A | 1.12  |
| 256 | A | 1.103 |
| 257 | A | 1.398 |

|     |   |       |
|-----|---|-------|
| 258 | A | 1.333 |
| 259 | A | 1.008 |
| 260 | A | 1.597 |
| 261 | A | 1.638 |
| 262 | A | 1.662 |
| 263 | A | 1.824 |
| 264 | A | 2.354 |
| 265 | A | 1.945 |
| 266 | A | 1.006 |
| 267 | A | 0.717 |
| 268 | A | 0.225 |
| 269 | A | 0.253 |
| 270 | A | 0.652 |
| 271 | A | 0.714 |
| 272 | A | 0.564 |
| 273 | A | 0.635 |
| 274 | A | 0.662 |
| 275 | A | 0.834 |
| 276 | A | 0.612 |
| 277 | A | 0.894 |
| 278 | A | 0.96  |
| 279 | A | 0.758 |
| 280 | A | 0.761 |
| 281 | A | 0.408 |
| 282 | A | 0.805 |
| 283 | A | 0.708 |
| 284 | A | 0.7   |
| 285 | A | 0.585 |
| 286 | A | 0.719 |
| 287 | A | 0.61  |
| 288 | A | 1.274 |
| 289 | A | 1.344 |
| 290 | A | 0.914 |
| 291 | A | 0.508 |
| 292 | A | 0.415 |
| 293 | A | 0.433 |
| 294 | A | 0.334 |
| 295 | A | 0.291 |
| 296 | A | 0.259 |
| 297 | A | 0.45  |
| 298 | A | 1.241 |
| 299 | A | 1.252 |
| 300 | A | 1.076 |
| 301 | A | 1.363 |
| 302 | A | 1.158 |
| 303 | A | 1.674 |

|     |   |       |
|-----|---|-------|
| 304 | A | 1.318 |
| 305 | A | 1.885 |
| 306 | A | 1.294 |
| 307 | A | 1.567 |
| 308 | A | 1.57  |
| 309 | A | 1.235 |
| 310 | A | 1.095 |
| 311 | A | 0.988 |
| 312 | A | 0.829 |
| 313 | A | 0.52  |
| 314 | A | 0.422 |
| 315 | A | 0.492 |
| 316 | A | 0.325 |
| 317 | A | 0.164 |
| 318 | A | 0.16  |
| 319 | A | 0.283 |
| 320 | A | 0.149 |
| 321 | A | 0.137 |
| 322 | A | 0.28  |
| 323 | A | 0.185 |
| 324 | A | 0.221 |
| 325 | A | 0.148 |
| 326 | A | 0.539 |
| 327 | A | 0.547 |
| 328 | A | 0.675 |
| 329 | A | 1.093 |
| 330 | A | 1.73  |
| 331 | A | 1.923 |
| 332 | A | 1.947 |
| 333 | A | 2.117 |
| 334 | A | 1.744 |
| 335 | A | 2.054 |
| 336 | A | 1.138 |
| 337 | A | 0.619 |
| 338 | A | 0.732 |
| 339 | A | 0.618 |
| 340 | A | 0.948 |
| 341 | A | 0.779 |
| 342 | A | 0.333 |
| 343 | A | 0.418 |
| 344 | A | 0.42  |
| 345 | A | 0.313 |
| 346 | A | 0.439 |
| 347 | A | 0.505 |
| 348 | A | 0.499 |
| 349 | A | 0.573 |

|     |   |       |
|-----|---|-------|
| 350 | A | 0.596 |
| 351 | A | 1.018 |
| 352 | A | 2.767 |
| 353 | A | 2.826 |
| 354 | A | 2.566 |
| 355 | A | 1.174 |
| 356 | A | 0.752 |
| 357 | A | 0.728 |
| 358 | A | 0.746 |
| 359 | A | 0.849 |
| 360 | A | 0.712 |
| 361 | A | 0.626 |
| 362 | A | 0.477 |
| 363 | A | 0.624 |
| 364 | A | 0.501 |
| 365 | A | 0.218 |
| 366 | A | 0.343 |
| 367 | A | 0.705 |
| 368 | A | 0.783 |
| 369 | A | 0.298 |
| 370 | A | 0.293 |
| 371 | A | 0.672 |

**Supplementary Table S3: RMSF Values Profile of NPTX1**

| <i>Residue No.</i> | <i>Chain</i> | <i>RMSF Value</i> |
|--------------------|--------------|-------------------|
| 225                | A            | 3.185             |
| 226                | A            | 1.585             |
| 227                | A            | 0.856             |
| 228                | A            | 0.474             |
| 229                | A            | 0.201             |
| 230                | A            | 0.24              |
| 231                | A            | 0.52              |
| 232                | A            | 0.459             |
| 233                | A            | 0.53              |
| 234                | A            | 0.497             |
| 235                | A            | 1.038             |
| 236                | A            | 1.166             |
| 237                | A            | 1.39              |
| 238                | A            | 0.821             |
| 239                | A            | 0.266             |
| 240                | A            | 0.112             |
| 241                | A            | 0.129             |
| 242                | A            | 0.315             |



|     |   |       |
|-----|---|-------|
| 243 | A | 0.151 |
| 244 | A | 0.216 |
| 245 | A | 0.246 |
| 246 | A | 0.203 |
| 247 | A | 0.14  |
| 248 | A | 0.161 |
| 249 | A | 0.133 |
| 250 | A | 0.104 |
| 251 | A | 0.121 |
| 252 | A | 0.107 |
| 253 | A | 0.102 |
| 254 | A | 0.092 |
| 255 | A | 0.407 |
| 256 | A | 0.316 |
| 257 | A | 0.126 |
| 258 | A | 0.118 |
| 259 | A | 0.299 |
| 260 | A | 0.351 |
| 261 | A | 0.388 |
| 262 | A | 0.925 |
| 263 | A | 1.465 |
| 264 | A | 1.002 |
| 265 | A | 1.024 |
| 266 | A | 0.589 |
| 267 | A | 0.567 |
| 268 | A | 0.58  |
| 269 | A | 0.252 |
| 270 | A | 0.092 |
| 271 | A | 0.29  |
| 272 | A | 0.087 |
| 273 | A | 0.09  |
| 274 | A | 0.11  |
| 275 | A | 0.294 |
| 276 | A | 0.668 |
| 277 | A | 0.91  |
| 278 | A | 0.629 |
| 279 | A | 0.405 |
| 280 | A | 0.398 |
| 281 | A | 0.107 |
| 282 | A | 0.09  |
| 283 | A | 0.094 |
| 284 | A | 0.319 |
| 285 | A | 0.327 |
| 286 | A | 0.473 |
| 287 | A | 1.366 |
| 288 | A | 1.308 |

|     |   |       |
|-----|---|-------|
| 289 | A | 2.355 |
| 290 | A | 2.553 |
| 291 | A | 1.333 |
| 292 | A | 0.576 |
| 293 | A | 0.372 |
| 294 | A | 0.361 |
| 295 | A | 0.298 |
| 296 | A | 0.624 |
| 297 | A | 0.875 |
| 298 | A | 1.555 |
| 299 | A | 0.765 |
| 300 | A | 0.476 |
| 301 | A | 0.356 |
| 302 | A | 0.563 |
| 303 | A | 0.56  |
| 304 | A | 0.718 |
| 305 | A | 0.458 |
| 306 | A | 1.015 |
| 307 | A | 0.446 |
| 308 | A | 0.502 |
| 309 | A | 0.696 |
| 310 | A | 0.71  |
| 311 | A | 0.275 |
| 312 | A | 0.363 |
| 313 | A | 0.356 |
| 314 | A | 0.401 |
| 315 | A | 0.374 |
| 316 | A | 0.544 |
| 317 | A | 0.399 |
| 318 | A | 0.288 |
| 319 | A | 0.122 |
| 320 | A | 0.159 |
| 321 | A | 0.165 |
| 322 | A | 0.324 |
| 323 | A | 0.518 |
| 324 | A | 0.633 |
| 325 | A | 0.369 |
| 326 | A | 0.31  |
| 327 | A | 0.273 |
| 328 | A | 0.144 |
| 329 | A | 0.39  |
| 330 | A | 0.358 |
| 331 | A | 0.816 |
| 332 | A | 1.577 |
| 333 | A | 1.03  |
| 334 | A | 0.605 |

|     |   |       |
|-----|---|-------|
| 335 | A | 0.709 |
| 336 | A | 0.482 |
| 337 | A | 0.491 |
| 338 | A | 0.688 |
| 339 | A | 0.882 |
| 340 | A | 1.325 |
| 341 | A | 2.312 |
| 342 | A | 1.359 |
| 343 | A | 0.563 |
| 344 | A | 0.421 |
| 345 | A | 0.502 |
| 346 | A | 0.418 |
| 347 | A | 0.107 |
| 348 | A | 0.112 |
| 349 | A | 0.139 |
| 350 | A | 0.147 |
| 351 | A | 0.131 |
| 352 | A | 0.138 |
| 353 | A | 0.099 |
| 354 | A | 0.141 |
| 355 | A | 0.1   |
| 356 | A | 0.311 |
| 357 | A | 0.111 |
| 358 | A | 0.388 |
| 359 | A | 0.63  |
| 360 | A | 0.866 |
| 361 | A | 1.101 |
| 362 | A | 2.706 |
| 363 | A | 3.177 |
| 364 | A | 1.617 |
| 365 | A | 1.302 |
| 366 | A | 0.823 |
| 367 | A | 0.819 |
| 368 | A | 1.311 |
| 369 | A | 1.135 |
| 370 | A | 0.616 |
| 371 | A | 0.69  |
| 372 | A | 0.73  |
| 373 | A | 0.625 |
| 374 | A | 0.492 |
| 375 | A | 0.517 |
| 376 | A | 0.118 |
| 377 | A | 0.138 |
| 378 | A | 0.162 |
| 379 | A | 0.094 |
| 380 | A | 0.275 |

|     |   |       |
|-----|---|-------|
| 381 | A | 0.089 |
| 382 | A | 0.093 |
| 383 | A | 0.131 |
| 384 | A | 0.143 |
| 385 | A | 0.162 |
| 386 | A | 0.165 |
| 387 | A | 0.448 |
| 388 | A | 0.532 |
| 389 | A | 0.523 |
| 390 | A | 0.445 |
| 391 | A | 0.6   |
| 392 | A | 0.387 |
| 393 | A | 0.403 |
| 394 | A | 0.614 |
| 395 | A | 0.766 |
| 396 | A | 0.923 |
| 397 | A | 0.736 |
| 398 | A | 0.962 |
| 399 | A | 1.079 |
| 400 | A | 1.05  |
| 401 | A | 0.972 |
| 402 | A | 1.717 |
| 403 | A | 1.382 |
| 404 | A | 2.417 |
| 405 | A | 1.204 |
| 406 | A | 0.919 |
| 407 | A | 0.461 |
| 408 | A | 0.42  |
| 409 | A | 0.457 |
| 410 | A | 0.463 |
| 411 | A | 0.399 |
| 412 | A | 0.698 |
| 413 | A | 0.485 |
| 414 | A | 0.343 |
| 415 | A | 0.2   |
| 416 | A | 0.19  |
| 417 | A | 0.422 |
| 418 | A | 0.566 |
| 419 | A | 0.893 |
| 420 | A | 0.447 |
| 421 | A | 0.454 |
| 422 | A | 0.725 |
| 423 | A | 0.623 |
| 424 | A | 0.643 |
| 425 | A | 0.965 |
| 426 | A | 0.954 |

|     |   |       |
|-----|---|-------|
| 427 | A | 0.798 |
| 428 | A | 0.623 |
| 429 | A | 1.085 |

**Supplementary Table S4: RMSF Values Profile of CREG2**

| <i>Residue No.</i> | <i>Chain</i> | <i>RMSF Value</i> |
|--------------------|--------------|-------------------|
| 117                | A            | 2.306             |
| 118                | A            | 2.34              |
| 119                | A            | 2.607             |
| 120                | A            | 1.959             |
| 121                | A            | 1.538             |
| 122                | A            | 1.005             |
| 123                | A            | 0.558             |
| 124                | A            | 0.394             |
| 125                | A            | 0.395             |
| 126                | A            | 0.364             |
| 127                | A            | 0.296             |
| 128                | A            | 0.332             |
| 129                | A            | 0.442             |
| 130                | A            | 0.289             |
| 131                | A            | 0.359             |
| 132                | A            | 0.469             |
| 133                | A            | 0.561             |
| 134                | A            | 0.448             |
| 135                | A            | 0.306             |
| 136                | A            | 0.19              |
| 137                | A            | 0.159             |
| 138                | A            | 0.173             |
| 139                | A            | 0.153             |
| 140                | A            | 0.336             |
| 141                | A            | 0.545             |
| 142                | A            | 0.678             |
| 143                | A            | 1.776             |
| 144                | A            | 3.07              |
| 145                | A            | 4.122             |
| 146                | A            | 5.481             |
| 147                | A            | 5.852             |
| 148                | A            | 5.186             |
| 149                | A            | 3.373             |
| 150                | A            | 2.535             |
| 151                | A            | 1.861             |
| 152                | A            | 0.879             |
| 153                | A            | 0.967             |
| 154                | A            | 0.783             |

|     |   |       |
|-----|---|-------|
| 155 | A | 0.427 |
| 156 | A | 0.402 |
| 157 | A | 0.304 |
| 158 | A | 0.302 |
| 159 | A | 0.355 |
| 160 | A | 0.266 |
| 161 | A | 0.581 |
| 162 | A | 1.263 |
| 163 | A | 3.045 |
| 164 | A | 4.813 |
| 165 | A | 4.841 |
| 166 | A | 4.016 |
| 167 | A | 2.901 |
| 168 | A | 1.827 |
| 169 | A | 1.022 |
| 170 | A | 0.597 |
| 171 | A | 0.563 |
| 172 | A | 0.181 |
| 173 | A | 0.221 |
| 174 | A | 0.274 |
| 175 | A | 0.369 |
| 176 | A | 0.626 |
| 177 | A | 2.365 |
| 178 | A | 2.214 |
| 179 | A | 2.212 |
| 180 | A | 1.323 |
| 181 | A | 1.029 |
| 182 | A | 1.114 |
| 183 | A | 0.902 |
| 184 | A | 0.543 |
| 185 | A | 0.884 |
| 186 | A | 1.147 |
| 187 | A | 0.766 |
| 188 | A | 0.749 |
| 189 | A | 0.641 |
| 190 | A | 0.64  |
| 191 | A | 0.413 |
| 192 | A | 0.295 |
| 193 | A | 0.121 |
| 194 | A | 0.178 |
| 195 | A | 0.172 |
| 196 | A | 0.322 |
| 197 | A | 0.483 |
| 198 | A | 0.561 |
| 199 | A | 0.691 |
| 200 | A | 1.128 |

|     |   |       |
|-----|---|-------|
| 201 | A | 0.967 |
| 202 | A | 0.714 |
| 203 | A | 0.59  |
| 204 | A | 0.816 |
| 205 | A | 0.736 |
| 206 | A | 0.706 |
| 207 | A | 0.954 |
| 208 | A | 1.091 |
| 209 | A | 1.191 |
| 210 | A | 1.456 |
| 211 | A | 1.391 |
| 212 | A | 1.293 |
| 213 | A | 0.589 |
| 214 | A | 0.524 |
| 215 | A | 0.346 |
| 216 | A | 0.408 |
| 217 | A | 0.166 |
| 218 | A | 0.14  |
| 219 | A | 0.151 |
| 220 | A | 0.117 |
| 221 | A | 0.157 |
| 222 | A | 0.432 |
| 223 | A | 0.471 |
| 224 | A | 0.49  |
| 225 | A | 0.776 |
| 226 | A | 0.879 |
| 227 | A | 1.415 |
| 228 | A | 2.833 |
| 229 | A | 2.706 |
| 230 | A | 2.943 |
| 231 | A | 2.132 |
| 232 | A | 1.921 |
| 233 | A | 1.924 |
| 234 | A | 1.715 |
| 235 | A | 1.016 |
| 236 | A | 1.256 |
| 237 | A | 1.423 |
| 238 | A | 1.023 |
| 239 | A | 1.142 |
| 240 | A | 1.448 |
| 241 | A | 1.596 |
| 242 | A | 0.952 |
| 243 | A | 1.451 |
| 244 | A | 2.001 |
| 245 | A | 2.778 |
| 246 | A | 3.499 |

|     |   |       |
|-----|---|-------|
| 247 | A | 1.748 |
| 248 | A | 1.891 |
| 249 | A | 1.68  |
| 250 | A | 1.931 |
| 251 | A | 1.738 |
| 252 | A | 1.999 |
| 253 | A | 1.786 |
| 254 | A | 1.709 |
| 255 | A | 0.617 |
| 256 | A | 0.487 |
| 257 | A | 0.303 |
| 258 | A | 0.216 |
| 259 | A | 0.413 |
| 260 | A | 0.261 |
| 261 | A | 0.591 |
| 262 | A | 0.571 |
| 263 | A | 0.531 |
| 264 | A | 0.306 |
| 265 | A | 0.272 |
| 266 | A | 0.264 |
| 267 | A | 0.351 |
| 268 | A | 0.379 |
| 269 | A | 0.921 |
| 270 | A | 1.58  |
| 271 | A | 3.234 |
| 272 | A | 2.853 |
| 273 | A | 2.014 |
| 274 | A | 1.057 |
| 275 | A | 0.59  |
| 276 | A | 0.628 |
| 277 | A | 0.548 |
| 278 | A | 0.522 |
| 279 | A | 0.507 |
| 280 | A | 0.685 |
| 281 | A | 0.573 |
| 282 | A | 0.596 |
| 283 | A | 1.033 |
| 284 | A | 1.168 |
| 285 | A | 2.65  |
| 286 | A | 4.404 |



**Supplementary Table S5: RMSF Values Profile of SERPINI1**

| <i>Residue<br/>No.</i> | <i>Chain</i> | <i>RMSF Value</i> |
|------------------------|--------------|-------------------|
| 22                     | A            | 2.19              |
| 23                     | A            | 0.755             |
| 24                     | A            | 0.603             |
| 25                     | A            | 0.52              |
| 26                     | A            | 0.332             |
| 27                     | A            | 0.324             |
| 28                     | A            | 0.402             |
| 29                     | A            | 0.389             |
| 30                     | A            | 0.13              |
| 31                     | A            | 0.475             |
| 32                     | A            | 0.511             |
| 33                     | A            | 0.327             |
| 34                     | A            | 0.247             |
| 35                     | A            | 0.253             |
| 36                     | A            | 0.372             |
| 37                     | A            | 0.347             |
| 38                     | A            | 0.478             |
| 39                     | A            | 0.554             |
| 40                     | A            | 0.685             |
| 41                     | A            | 0.92              |
| 42                     | A            | 1.231             |
| 43                     | A            | 1.321             |
| 44                     | A            | 1.71              |
| 45                     | A            | 0.763             |
| 46                     | A            | 0.201             |
| 47                     | A            | 0.326             |
| 48                     | A            | 0.348             |
| 49                     | A            | 0.44              |
| 50                     | A            | 0.376             |
| 51                     | A            | 0.344             |
| 52                     | A            | 0.079             |
| 53                     | A            | 0.157             |
| 54                     | A            | 0.121             |
| 55                     | A            | 0.139             |
| 56                     | A            | 0.354             |
| 57                     | A            | 0.093             |
| 58                     | A            | 0.385             |
| 59                     | A            | 0.459             |
| 60                     | A            | 0.353             |
| 61                     | A            | 0.369             |
| 62                     | A            | 0.437             |
| 63                     | A            | 0.483             |

|     |   |       |
|-----|---|-------|
| 64  | A | 0.799 |
| 65  | A | 1.175 |
| 66  | A | 1.244 |
| 67  | A | 0.779 |
| 68  | A | 0.34  |
| 69  | A | 0.261 |
| 70  | A | 0.362 |
| 71  | A | 0.189 |
| 72  | A | 0.233 |
| 73  | A | 0.303 |
| 74  | A | 0.188 |
| 75  | A | 0.471 |
| 76  | A | 0.569 |
| 77  | A | 0.62  |
| 78  | A | 0.881 |
| 79  | A | 1.39  |
| 84  | A | 3.288 |
| 85  | A | 1.439 |
| 86  | A | 0.969 |
| 87  | A | 0.533 |
| 88  | A | 0.419 |
| 89  | A | 0.464 |
| 90  | A | 0.327 |
| 91  | A | 0.257 |
| 92  | A | 0.315 |
| 93  | A | 0.514 |
| 94  | A | 0.316 |
| 95  | A | 0.435 |
| 96  | A | 0.673 |
| 97  | A | 0.926 |
| 98  | A | 0.781 |
| 99  | A | 2.456 |
| 101 | A | 2.763 |
| 102 | A | 1.134 |
| 103 | A | 0.743 |
| 104 | A | 0.622 |
| 105 | A | 0.492 |
| 106 | A | 0.31  |
| 107 | A | 0.483 |
| 108 | A | 0.368 |
| 109 | A | 0.445 |
| 110 | A | 0.378 |
| 111 | A | 0.085 |
| 112 | A | 0.101 |
| 113 | A | 0.234 |
| 114 | A | 0.414 |

|     |   |       |
|-----|---|-------|
| 115 | A | 0.931 |
| 116 | A | 0.858 |
| 117 | A | 1.568 |
| 118 | A | 1.277 |
| 119 | A | 1.166 |
| 120 | A | 0.971 |
| 121 | A | 1.807 |
| 122 | A | 1.396 |
| 123 | A | 0.992 |
| 124 | A | 0.826 |
| 125 | A | 0.92  |
| 126 | A | 0.769 |
| 127 | A | 0.626 |
| 128 | A | 0.582 |
| 129 | A | 0.715 |
| 130 | A | 0.773 |
| 131 | A | 0.92  |
| 132 | A | 0.426 |
| 133 | A | 0.578 |
| 134 | A | 0.421 |
| 135 | A | 0.28  |
| 136 | A | 0.36  |
| 137 | A | 0.346 |
| 138 | A | 0.624 |
| 139 | A | 0.728 |
| 140 | A | 0.862 |
| 141 | A | 1.845 |
| 142 | A | 1.433 |
| 143 | A | 1.334 |
| 144 | A | 0.851 |
| 145 | A | 0.845 |
| 146 | A | 0.815 |
| 147 | A | 0.882 |
| 148 | A | 0.65  |
| 149 | A | 0.512 |
| 150 | A | 0.609 |
| 151 | A | 0.679 |
| 152 | A | 0.724 |
| 153 | A | 0.738 |
| 154 | A | 0.873 |
| 155 | A | 1.093 |
| 156 | A | 1.062 |
| 157 | A | 1.13  |
| 158 | A | 1.478 |
| 159 | A | 1.718 |
| 160 | A | 2.869 |

|     |   |       |
|-----|---|-------|
| 161 | A | 2.156 |
| 162 | A | 2.13  |
| 163 | A | 1.812 |
| 164 | A | 1.733 |
| 165 | A | 1.646 |
| 166 | A | 1.069 |
| 167 | A | 0.77  |
| 168 | A | 1.083 |
| 169 | A | 1.097 |
| 170 | A | 2.134 |
| 171 | A | 1.056 |
| 172 | A | 0.837 |
| 173 | A | 1.44  |
| 174 | A | 3.155 |
| 175 | A | 3.152 |
| 176 | A | 0.908 |
| 177 | A | 0.089 |
| 178 | A | 0.199 |
| 179 | A | 0.077 |
| 180 | A | 0.157 |
| 181 | A | 0.297 |
| 182 | A | 0.132 |
| 183 | A | 0.377 |
| 184 | A | 0.456 |
| 185 | A | 0.342 |
| 186 | A | 0.36  |
| 187 | A | 0.482 |
| 188 | A | 0.342 |
| 189 | A | 0.469 |
| 190 | A | 0.343 |
| 191 | A | 0.654 |
| 192 | A | 1.232 |
| 193 | A | 2.003 |
| 194 | A | 2.33  |
| 195 | A | 1.946 |
| 196 | A | 2.221 |
| 197 | A | 2.408 |
| 198 | A | 1.719 |
| 199 | A | 1.814 |
| 200 | A | 0.678 |
| 201 | A | 0.531 |
| 202 | A | 0.622 |
| 203 | A | 0.611 |
| 204 | A | 0.417 |
| 205 | A | 0.66  |
| 206 | A | 0.893 |

|     |   |       |
|-----|---|-------|
| 207 | A | 1.687 |
| 208 | A | 1.627 |
| 209 | A | 1.539 |
| 210 | A | 1.214 |
| 211 | A | 0.767 |
| 212 | A | 0.501 |
| 213 | A | 0.658 |
| 214 | A | 0.423 |
| 215 | A | 0.353 |
| 216 | A | 0.305 |
| 217 | A | 0.303 |
| 218 | A | 0.376 |
| 219 | A | 0.37  |
| 220 | A | 0.426 |
| 221 | A | 0.56  |
| 222 | A | 0.616 |
| 223 | A | 0.292 |
| 224 | A | 0.33  |
| 225 | A | 0.188 |
| 226 | A | 0.387 |
| 227 | A | 0.571 |
| 228 | A | 0.6   |
| 229 | A | 0.778 |
| 230 | A | 1.482 |
| 231 | A | 3.342 |
| 237 | A | 3.402 |
| 238 | A | 0.918 |
| 239 | A | 0.212 |
| 240 | A | 0.142 |
| 241 | A | 0.106 |
| 242 | A | 0.192 |
| 243 | A | 0.184 |
| 244 | A | 0.314 |
| 245 | A | 0.397 |
| 246 | A | 0.777 |
| 247 | A | 1.713 |
| 248 | A | 1.785 |
| 249 | A | 1.708 |
| 250 | A | 0.957 |
| 251 | A | 0.578 |
| 252 | A | 0.347 |
| 253 | A | 0.392 |
| 254 | A | 0.082 |
| 255 | A | 0.082 |
| 256 | A | 0.153 |
| 257 | A | 0.13  |

|     |   |       |
|-----|---|-------|
| 258 | A | 0.641 |
| 259 | A | 1.217 |
| 260 | A | 1.848 |
| 261 | A | 1.887 |
| 262 | A | 1.128 |
| 263 | A | 1.243 |
| 264 | A | 0.943 |
| 265 | A | 1.4   |
| 266 | A | 1.109 |
| 267 | A | 0.946 |
| 268 | A | 1.212 |
| 269 | A | 0.989 |
| 270 | A | 0.944 |
| 271 | A | 0.672 |
| 272 | A | 0.678 |
| 273 | A | 0.362 |
| 274 | A | 0.395 |
| 275 | A | 0.373 |
| 276 | A | 0.372 |
| 277 | A | 0.34  |
| 278 | A | 0.324 |
| 279 | A | 0.325 |
| 280 | A | 0.359 |
| 281 | A | 0.495 |
| 282 | A | 0.506 |
| 283 | A | 0.92  |
| 284 | A | 0.713 |
| 285 | A | 0.591 |
| 286 | A | 0.513 |
| 287 | A | 0.47  |
| 288 | A | 0.444 |
| 289 | A | 0.43  |
| 290 | A | 0.292 |
| 291 | A | 0.337 |
| 292 | A | 0.596 |
| 293 | A | 0.258 |
| 294 | A | 0.446 |
| 295 | A | 0.14  |
| 296 | A | 0.087 |
| 297 | A | 0.122 |
| 298 | A | 0.113 |
| 299 | A | 0.366 |
| 300 | A | 0.089 |
| 301 | A | 0.249 |
| 302 | A | 0.162 |
| 303 | A | 0.197 |

|     |   |       |
|-----|---|-------|
| 304 | A | 0.382 |
| 305 | A | 0.433 |
| 306 | A | 0.49  |
| 307 | A | 0.176 |
| 308 | A | 0.402 |
| 309 | A | 0.541 |
| 310 | A | 0.551 |
| 311 | A | 1.025 |
| 312 | A | 0.804 |
| 313 | A | 0.86  |
| 314 | A | 0.771 |
| 315 | A | 0.777 |
| 316 | A | 0.355 |
| 317 | A | 0.367 |
| 318 | A | 0.695 |
| 319 | A | 0.738 |
| 320 | A | 0.654 |
| 321 | A | 0.999 |
| 322 | A | 0.724 |
| 323 | A | 1.22  |
| 324 | A | 0.781 |
| 325 | A | 0.546 |
| 326 | A | 0.701 |
| 327 | A | 1.262 |
| 328 | A | 1.985 |
| 329 | A | 1.256 |
| 330 | A | 0.729 |
| 331 | A | 0.35  |
| 332 | A | 0.302 |
| 333 | A | 0.145 |
| 334 | A | 0.473 |
| 335 | A | 0.132 |
| 336 | A | 0.161 |
| 337 | A | 0.107 |
| 338 | A | 0.135 |
| 339 | A | 0.06  |
| 340 | A | 0.083 |
| 341 | A | 0.191 |
| 342 | A | 0.059 |
| 343 | A | 0.081 |
| 344 | A | 0.257 |
| 345 | A | 0.917 |
| 346 | A | 0.832 |
| 347 | A | 1.122 |
| 348 | A | 0.78  |
| 349 | A | 1.564 |

|     |   |       |
|-----|---|-------|
| 350 | A | 3.037 |
| 351 | A | 4.743 |
| 352 | A | 6.709 |
| 353 | A | 8.807 |
| 359 | A | 3.664 |
| 360 | A | 3.459 |
| 361 | A | 4.019 |
| 362 | A | 3.85  |
| 363 | A | 4.227 |
| 364 | A | 3.129 |
| 365 | A | 2.44  |
| 366 | A | 2.599 |
| 367 | A | 1.501 |
| 368 | A | 1.291 |
| 369 | A | 0.792 |
| 370 | A | 0.657 |
| 371 | A | 1.474 |
| 372 | A | 0.544 |
| 373 | A | 0.583 |
| 374 | A | 0.533 |
| 375 | A | 0.44  |
| 376 | A | 0.317 |
| 377 | A | 0.253 |
| 378 | A | 0.414 |
| 379 | A | 0.431 |
| 380 | A | 0.284 |
| 381 | A | 0.368 |
| 382 | A | 0.453 |
| 383 | A | 0.723 |
| 384 | A | 0.807 |
| 385 | A | 1.139 |
| 386 | A | 0.899 |
| 387 | A | 0.589 |
| 388 | A | 0.298 |
| 389 | A | 0.233 |
| 390 | A | 0.094 |
| 391 | A | 0.078 |
| 392 | A | 0.34  |
| 393 | A | 0.315 |
| 394 | A | 0.438 |
| 395 | A | 0.775 |
| 396 | A | 1.518 |
| 397 | A | 2.197 |
| 398 | A | 2.663 |
| 399 | A | 2.599 |
| 400 | A | 3.84  |



**Supplementary Table S6: RMSF Values Profile of OPCML**

| <i>Residue<br/>No.</i> | <i>Chain</i> | <i>RMSF Value</i> |
|------------------------|--------------|-------------------|
| 42                     | A            | 2.688             |
| 43                     | A            | 2.498             |
| 44                     | A            | 2.453             |
| 45                     | A            | 2.449             |
| 46                     | A            | 2.416             |
| 47                     | A            | 2.429             |
| 48                     | A            | 2.42              |
| 49                     | A            | 2.44              |
| 50                     | A            | 2.496             |
| 51                     | A            | 2.507             |
| 52                     | A            | 2.53              |
| 53                     | A            | 2.51              |
| 54                     | A            | 2.527             |
| 55                     | A            | 2.533             |
| 56                     | A            | 2.647             |
| 57                     | A            | 2.8               |
| 58                     | A            | 2.892             |
| 59                     | A            | 3.146             |
| 60                     | A            | 3.282             |
| 61                     | A            | 3.551             |
| 62                     | A            | 3.735             |
| 63                     | A            | 3.181             |
| 64                     | A            | 2.926             |
| 65                     | A            | 2.585             |
| 66                     | A            | 2.502             |
| 67                     | A            | 2.447             |
| 68                     | A            | 2.402             |
| 69                     | A            | 2.432             |
| 70                     | A            | 2.417             |
| 71                     | A            | 2.593             |
| 72                     | A            | 2.815             |
| 73                     | A            | 2.562             |
| 74                     | A            | 2.48              |
| 75                     | A            | 2.447             |
| 76                     | A            | 2.478             |
| 77                     | A            | 2.487             |
| 78                     | A            | 2.563             |
| 79                     | A            | 3.067             |
| 80                     | A            | 2.882             |
| 81                     | A            | 2.7               |
| 82                     | A            | 2.771             |

|     |   |       |
|-----|---|-------|
| 83  | A | 2.875 |
| 84  | A | 2.734 |
| 85  | A | 2.755 |
| 86  | A | 2.785 |
| 87  | A | 2.693 |
| 88  | A | 2.625 |
| 89  | A | 2.719 |
| 90  | A | 2.641 |
| 91  | A | 2.702 |
| 92  | A | 2.539 |
| 93  | A | 2.737 |
| 94  | A | 2.8   |
| 95  | A | 3.267 |
| 96  | A | 2.804 |
| 97  | A | 2.726 |
| 98  | A | 2.604 |
| 99  | A | 2.491 |
| 100 | A | 2.593 |
| 101 | A | 2.578 |
| 102 | A | 2.555 |
| 103 | A | 2.586 |
| 104 | A | 2.698 |
| 105 | A | 2.56  |
| 106 | A | 2.901 |
| 107 | A | 3.835 |
| 108 | A | 4.058 |
| 109 | A | 2.912 |
| 110 | A | 2.564 |
| 111 | A | 2.464 |
| 112 | A | 2.466 |
| 113 | A | 2.623 |
| 114 | A | 2.663 |
| 115 | A | 2.508 |
| 116 | A | 2.652 |
| 117 | A | 2.608 |
| 118 | A | 2.778 |
| 119 | A | 3.031 |
| 120 | A | 3.446 |
| 121 | A | 3.472 |
| 122 | A | 3.107 |
| 123 | A | 2.935 |
| 124 | A | 2.829 |
| 125 | A | 2.712 |
| 126 | A | 2.607 |
| 127 | A | 2.496 |
| 128 | A | 2.516 |

|     |   |       |
|-----|---|-------|
| 129 | A | 2.482 |
| 130 | A | 2.456 |
| 131 | A | 2.413 |
| 132 | A | 2.404 |
| 133 | A | 2.377 |
| 134 | A | 2.374 |
| 135 | A | 2.36  |
| 136 | A | 2.34  |
| 137 | A | 2.359 |
| 138 | A | 2.362 |
| 139 | A | 2.41  |
| 140 | A | 2.431 |
| 141 | A | 2.397 |
| 142 | A | 2.426 |
| 143 | A | 2.473 |
| 144 | A | 2.481 |
| 145 | A | 2.506 |
| 146 | A | 2.532 |
| 147 | A | 2.543 |
| 148 | A | 2.564 |
| 149 | A | 2.537 |
| 150 | A | 2.902 |
| 151 | A | 2.762 |
| 152 | A | 2.604 |
| 153 | A | 2.544 |
| 154 | A | 2.433 |
| 155 | A | 2.389 |
| 156 | A | 2.381 |
| 157 | A | 2.349 |
| 158 | A | 2.362 |
| 159 | A | 2.356 |
| 160 | A | 2.358 |
| 161 | A | 2.344 |
| 162 | A | 2.349 |
| 163 | A | 2.34  |
| 164 | A | 2.331 |
| 165 | A | 2.58  |
| 166 | A | 2.566 |
| 167 | A | 2.297 |
| 168 | A | 2.305 |
| 169 | A | 2.318 |
| 170 | A | 2.34  |
| 171 | A | 2.376 |
| 172 | A | 2.826 |
| 173 | A | 4.649 |
| 179 | A | 3.06  |

|     |   |       |
|-----|---|-------|
| 180 | A | 1.369 |
| 181 | A | 1.156 |
| 182 | A | 1.249 |
| 183 | A | 1.62  |
| 184 | A | 2.537 |
| 185 | A | 2.94  |
| 186 | A | 1.815 |
| 187 | A | 1.946 |
| 188 | A | 1.877 |
| 189 | A | 2.018 |
| 190 | A | 1.963 |
| 191 | A | 2.078 |
| 192 | A | 2.543 |
| 193 | A | 2.335 |
| 194 | A | 2.332 |
| 195 | A | 2.319 |
| 196 | A | 2.306 |
| 197 | A | 2.315 |
| 198 | A | 2.321 |
| 199 | A | 2.323 |
| 200 | A | 2.312 |
| 201 | A | 2.324 |
| 202 | A | 2.335 |
| 203 | A | 2.35  |
| 204 | A | 2.375 |
| 205 | A | 2.395 |
| 206 | A | 2.432 |
| 207 | A | 2.452 |
| 208 | A | 2.471 |
| 209 | A | 2.488 |
| 210 | A | 2.456 |
| 211 | A | 2.409 |
| 212 | A | 2.405 |
| 213 | A | 2.382 |
| 214 | A | 2.379 |
| 215 | A | 2.358 |
| 216 | A | 2.366 |
| 217 | A | 2.355 |
| 218 | A | 2.344 |
| 219 | A | 2.363 |
| 220 | A | 2.362 |
| 221 | A | 2.401 |
| 222 | A | 2.404 |
| 223 | A | 2.444 |
| 224 | A | 2.442 |
| 225 | A | 2.439 |

|     |   |       |
|-----|---|-------|
| 226 | A | 2.458 |
| 227 | A | 2.404 |
| 228 | A | 2.454 |
| 229 | A | 2.511 |
| 230 | A | 2.627 |
| 231 | A | 2.734 |
| 232 | A | 2.798 |
| 233 | A | 2.914 |
| 234 | A | 3.04  |
| 235 | A | 3.389 |
| 236 | A | 3.888 |
| 237 | A | 4.024 |
| 238 | A | 3.686 |
| 239 | A | 3.104 |
| 240 | A | 2.858 |
| 241 | A | 2.742 |
| 242 | A | 2.782 |
| 243 | A | 2.671 |
| 244 | A | 2.558 |
| 245 | A | 2.488 |
| 246 | A | 2.422 |
| 247 | A | 2.428 |
| 248 | A | 2.423 |
| 249 | A | 2.422 |
| 250 | A | 2.471 |
| 251 | A | 2.493 |
| 252 | A | 2.519 |
| 253 | A | 2.582 |
| 254 | A | 2.618 |
| 255 | A | 2.664 |
| 256 | A | 2.73  |
| 257 | A | 2.679 |
| 258 | A | 2.763 |
| 259 | A | 2.824 |
| 260 | A | 3.183 |
| 261 | A | 2.858 |
| 262 | A | 2.897 |
| 263 | A | 2.994 |
| 264 | A | 3.311 |
| 265 | A | 3.372 |
| 266 | A | 3.588 |
| 267 | A | 3.659 |
| 268 | A | 3.273 |
| 269 | A | 3.16  |
| 270 | A | 2.911 |
| 271 | A | 2.871 |

|     |   |       |
|-----|---|-------|
| 272 | A | 2.829 |
| 273 | A | 2.808 |
| 274 | A | 2.735 |
| 275 | A | 2.845 |
| 276 | A | 2.871 |
| 277 | A | 2.604 |
| 278 | A | 2.609 |
| 279 | A | 2.619 |
| 280 | A | 2.718 |
| 281 | A | 2.755 |
| 282 | A | 2.757 |
| 283 | A | 2.823 |
| 284 | A | 2.876 |
| 285 | A | 2.96  |
| 286 | A | 3.08  |
| 287 | A | 3.235 |
| 288 | A | 3.299 |
| 289 | A | 3.221 |
| 290 | A | 3.07  |
| 291 | A | 3.011 |
| 292 | A | 2.864 |
| 293 | A | 2.736 |
| 294 | A | 2.677 |
| 295 | A | 2.674 |
| 296 | A | 2.535 |
| 297 | A | 2.634 |
| 298 | A | 2.534 |
| 299 | A | 2.555 |
| 300 | A | 2.536 |
| 301 | A | 2.556 |
| 302 | A | 2.52  |
| 303 | A | 2.521 |
| 304 | A | 2.53  |
| 305 | A | 2.515 |
| 306 | A | 2.618 |
| 307 | A | 2.606 |
| 308 | A | 2.632 |
| 309 | A | 2.633 |
| 310 | A | 2.676 |
| 311 | A | 2.788 |
| 312 | A | 2.918 |
| 313 | A | 3.196 |
| 314 | A | 3.61  |
| 315 | A | 4.084 |
| 316 | A | 4.046 |
| 317 | A | 3.587 |

|     |   |       |
|-----|---|-------|
| 318 | A | 3.586 |
| 319 | A | 3.868 |

**Supplementary Table S7: RMSF Values Profile of LGI1**

| <i>Residue<br/>No.</i> | <i>Chain</i> | <i>RMSF Value</i> |
|------------------------|--------------|-------------------|
| 224                    | A            | 1.617             |
| 225                    | A            | 0.75              |
| 226                    | A            | 0.573             |
| 227                    | A            | 0.505             |
| 228                    | A            | 0.546             |
| 229                    | A            | 0.723             |
| 230                    | A            | 0.519             |
| 231                    | A            | 0.638             |
| 232                    | A            | 0.515             |
| 233                    | A            | 0.545             |
| 234                    | A            | 0.831             |
| 235                    | A            | 0.677             |
| 236                    | A            | 0.436             |
| 237                    | A            | 0.432             |
| 238                    | A            | 0.14              |
| 239                    | A            | 0.13              |
| 240                    | A            | 0.304             |
| 241                    | A            | 0.247             |
| 242                    | A            | 0.35              |
| 243                    | A            | 0.762             |
| 244                    | A            | 1.51              |
| 245                    | A            | 2.215             |
| 246                    | A            | 2.457             |
| 247                    | A            | 1.04              |
| 248                    | A            | 0.429             |
| 249                    | A            | 0.264             |
| 250                    | A            | 0.186             |
| 251                    | A            | 0.172             |
| 252                    | A            | 0.163             |
| 253                    | A            | 0.319             |
| 254                    | A            | 0.499             |
| 255                    | A            | 0.697             |
| 256                    | A            | 1.322             |
| 257                    | A            | 1.109             |
| 258                    | A            | 0.673             |
| 259                    | A            | 0.446             |
| 260                    | A            | 0.43              |
| 261                    | A            | 0.339             |

|     |   |       |
|-----|---|-------|
| 262 | A | 0.463 |
| 263 | A | 0.291 |
| 264 | A | 0.485 |
| 265 | A | 0.711 |
| 266 | A | 1.212 |
| 267 | A | 1.952 |
| 268 | A | 1.963 |
| 269 | A | 2.04  |
| 270 | A | 2.05  |
| 271 | A | 1.4   |
| 272 | A | 0.786 |
| 273 | A | 0.367 |
| 274 | A | 0.515 |
| 275 | A | 0.485 |
| 276 | A | 0.224 |
| 277 | A | 0.598 |
| 278 | A | 0.587 |
| 279 | A | 0.59  |
| 280 | A | 0.767 |
| 281 | A | 0.749 |
| 282 | A | 0.678 |
| 283 | A | 0.486 |
| 284 | A | 0.368 |
| 285 | A | 0.323 |
| 286 | A | 0.291 |
| 287 | A | 0.182 |
| 288 | A | 0.261 |
| 289 | A | 0.429 |
| 290 | A | 0.615 |
| 291 | A | 0.769 |
| 292 | A | 1.526 |
| 293 | A | 1.355 |
| 294 | A | 0.74  |
| 295 | A | 0.502 |
| 296 | A | 0.571 |
| 297 | A | 0.316 |
| 298 | A | 0.333 |
| 299 | A | 0.227 |
| 300 | A | 0.227 |
| 301 | A | 0.573 |
| 302 | A | 0.789 |
| 303 | A | 1.191 |
| 304 | A | 1.393 |
| 305 | A | 0.866 |
| 306 | A | 0.598 |
| 307 | A | 0.483 |



|     |   |       |
|-----|---|-------|
| 308 | A | 0.308 |
| 309 | A | 0.162 |
| 310 | A | 0.229 |
| 311 | A | 0.817 |
| 312 | A | 1.197 |
| 313 | A | 1.696 |
| 314 | A | 2.284 |
| 315 | A | 2.945 |
| 316 | A | 1.85  |
| 317 | A | 1.275 |
| 318 | A | 0.718 |
| 319 | A | 0.689 |
| 320 | A | 0.578 |
| 321 | A | 0.76  |
| 322 | A | 0.662 |
| 323 | A | 0.816 |
| 324 | A | 1.213 |
| 325 | A | 2.301 |
| 326 | A | 2.742 |
| 327 | A | 2.934 |
| 328 | A | 2.717 |
| 329 | A | 1.781 |
| 330 | A | 0.937 |
| 331 | A | 0.645 |
| 332 | A | 0.398 |
| 333 | A | 0.495 |
| 334 | A | 0.4   |
| 335 | A | 0.084 |
| 336 | A | 0.195 |
| 337 | A | 0.417 |
| 338 | A | 0.545 |
| 339 | A | 0.645 |
| 340 | A | 0.592 |
| 341 | A | 1.059 |
| 342 | A | 1.371 |
| 343 | A | 0.522 |
| 344 | A | 0.442 |
| 345 | A | 0.402 |
| 346 | A | 0.199 |
| 347 | A | 0.131 |
| 348 | A | 0.099 |
| 349 | A | 0.125 |
| 350 | A | 0.185 |
| 351 | A | 0.602 |
| 352 | A | 0.848 |
| 353 | A | 1.234 |

|     |   |       |
|-----|---|-------|
| 354 | A | 1.327 |
| 355 | A | 0.989 |
| 356 | A | 0.506 |
| 357 | A | 0.292 |
| 358 | A | 0.146 |
| 359 | A | 0.236 |
| 360 | A | 0.229 |
| 361 | A | 0.313 |
| 362 | A | 0.479 |
| 363 | A | 0.94  |
| 364 | A | 1.469 |
| 365 | A | 1.308 |
| 366 | A | 1.698 |
| 367 | A | 0.774 |
| 368 | A | 0.531 |
| 369 | A | 0.624 |
| 370 | A | 0.643 |
| 371 | A | 0.236 |
| 372 | A | 0.63  |
| 373 | A | 0.434 |
| 374 | A | 0.867 |
| 375 | A | 1.749 |
| 376 | A | 1.348 |
| 377 | A | 0.79  |
| 378 | A | 0.801 |
| 379 | A | 0.449 |
| 380 | A | 0.101 |
| 381 | A | 0.078 |
| 382 | A | 0.329 |
| 383 | A | 0.281 |
| 384 | A | 0.392 |
| 385 | A | 0.393 |
| 386 | A | 0.858 |
| 387 | A | 1.461 |
| 388 | A | 2.242 |
| 389 | A | 3.024 |
| 390 | A | 3.747 |
| 391 | A | 4.614 |
| 392 | A | 4.553 |
| 393 | A | 3.547 |
| 394 | A | 2.564 |
| 395 | A | 1.76  |
| 396 | A | 1.148 |
| 397 | A | 0.634 |
| 398 | A | 0.183 |
| 399 | A | 0.256 |

|     |   |       |
|-----|---|-------|
| 400 | A | 0.263 |
| 401 | A | 0.289 |
| 402 | A | 0.113 |
| 403 | A | 0.762 |
| 404 | A | 1.103 |
| 405 | A | 1.775 |
| 406 | A | 1.076 |
| 407 | A | 0.998 |
| 408 | A | 0.621 |
| 409 | A | 0.405 |
| 410 | A | 0.415 |
| 411 | A | 0.494 |
| 412 | A | 0.192 |
| 413 | A | 0.144 |
| 414 | A | 0.907 |
| 415 | A | 1.522 |
| 416 | A | 2.309 |
| 417 | A | 1.44  |
| 418 | A | 0.723 |
| 419 | A | 0.508 |
| 420 | A | 0.545 |
| 421 | A | 1.206 |
| 422 | A | 0.475 |
| 423 | A | 0.666 |
| 424 | A | 0.645 |
| 425 | A | 0.663 |
| 426 | A | 0.757 |
| 427 | A | 1.362 |
| 428 | A | 1.402 |
| 429 | A | 1.18  |
| 430 | A | 1.013 |
| 431 | A | 1.12  |
| 432 | A | 0.734 |
| 433 | A | 0.409 |
| 434 | A | 0.102 |
| 435 | A | 0.119 |
| 436 | A | 0.072 |
| 437 | A | 0.086 |
| 438 | A | 0.096 |
| 439 | A | 0.151 |
| 440 | A | 0.47  |
| 441 | A | 0.895 |
| 442 | A | 1.503 |
| 443 | A | 0.744 |
| 444 | A | 0.52  |
| 445 | A | 0.285 |

|     |   |       |
|-----|---|-------|
| 446 | A | 0.088 |
| 447 | A | 0.349 |
| 448 | A | 0.101 |
| 449 | A | 0.143 |
| 450 | A | 0.35  |
| 451 | A | 0.524 |
| 452 | A | 0.668 |
| 453 | A | 0.812 |
| 454 | A | 0.571 |
| 455 | A | 0.579 |
| 456 | A | 0.624 |
| 457 | A | 0.264 |
| 458 | A | 0.12  |
| 459 | A | 0.259 |
| 460 | A | 0.517 |
| 461 | A | 1.437 |
| 462 | A | 2.345 |
| 463 | A | 2.525 |
| 464 | A | 2.01  |
| 465 | A | 1.063 |
| 466 | A | 0.434 |
| 467 | A | 0.516 |
| 468 | A | 0.537 |
| 469 | A | 0.904 |
| 470 | A | 0.976 |
| 471 | A | 0.499 |
| 472 | A | 0.536 |
| 473 | A | 0.63  |
| 474 | A | 0.694 |
| 475 | A | 0.677 |
| 476 | A | 0.665 |
| 477 | A | 0.583 |
| 478 | A | 0.166 |
| 479 | A | 0.301 |
| 480 | A | 0.309 |
| 481 | A | 0.107 |
| 482 | A | 0.088 |
| 483 | A | 0.19  |
| 484 | A | 0.49  |
| 485 | A | 0.889 |
| 486 | A | 1.06  |
| 487 | A | 0.263 |
| 488 | A | 0.222 |
| 489 | A | 0.094 |
| 490 | A | 0.081 |
| 491 | A | 0.357 |

|     |   |       |
|-----|---|-------|
| 492 | A | 0.498 |
| 493 | A | 0.887 |
| 494 | A | 0.969 |
| 495 | A | 1.136 |
| 496 | A | 2.11  |
| 497 | A | 2.034 |
| 498 | A | 0.821 |
| 499 | A | 0.73  |
| 500 | A | 0.447 |
| 501 | A | 0.286 |
| 502 | A | 0.099 |
| 503 | A | 0.32  |
| 504 | A | 0.286 |
| 505 | A | 0.335 |
| 506 | A | 0.769 |
| 507 | A | 0.937 |
| 508 | A | 0.852 |
| 509 | A | 0.888 |
| 510 | A | 0.441 |
| 511 | A | 0.171 |
| 512 | A | 0.293 |
| 513 | A | 0.468 |
| 514 | A | 0.356 |
| 515 | A | 0.296 |
| 516 | A | 0.467 |
| 517 | A | 0.641 |
| 518 | A | 0.79  |
| 519 | A | 0.55  |
| 520 | A | 0.842 |
| 521 | A | 0.507 |
| 522 | A | 0.221 |
| 523 | A | 0.06  |
| 524 | A | 0.052 |
| 525 | A | 0.183 |
| 526 | A | 0.225 |
| 527 | A | 0.231 |
| 528 | A | 0.359 |
| 529 | A | 0.391 |
| 530 | A | 0.658 |
| 531 | A | 1.23  |
| 532 | A | 1.26  |
| 533 | A | 0.646 |
| 534 | A | 0.285 |
| 535 | A | 0.313 |
| 536 | A | 0.084 |
| 537 | A | 0.093 |

|     |   |       |
|-----|---|-------|
| 538 | A | 0.062 |
| 539 | A | 0.057 |
| 540 | A | 0.081 |
| 541 | A | 0.583 |
| 542 | A | 0.783 |
| 543 | A | 0.87  |
| 544 | A | 0.705 |
| 545 | A | 0.461 |
| 546 | A | 0.215 |
| 547 | A | 0.185 |
| 548 | A | 0.157 |
| 549 | A | 0.32  |
| 550 | A | 0.381 |
| 551 | A | 1.05  |

**Supplementary Table S8: RMSF Values Profile of CNTN**

| <i>Residue No.</i> | <i>Chain</i> | <i>RMSF Value</i> |
|--------------------|--------------|-------------------|
| 4                  | A            | 3.365             |
| 5                  | A            | 1.337             |
| 6                  | A            | 0.713             |
| 7                  | A            | 0.27              |
| 8                  | A            | 0.424             |
| 9                  | A            | 0.383             |
| 10                 | A            | 0.763             |
| 11                 | A            | 1.194             |
| 12                 | A            | 1.772             |
| 13                 | A            | 1.383             |
| 14                 | A            | 0.924             |
| 15                 | A            | 0.561             |
| 16                 | A            | 0.348             |
| 17                 | A            | 0.331             |
| 18                 | A            | 0.306             |
| 19                 | A            | 0.498             |
| 20                 | A            | 0.567             |
| 21                 | A            | 1.298             |
| 22                 | A            | 2.27              |
| 23                 | A            | 1.746             |
| 24                 | A            | 1.86              |
| 25                 | A            | 1.323             |
| 26                 | A            | 0.987             |
| 27                 | A            | 0.655             |
| 28                 | A            | 0.744             |
| 29                 | A            | 0.687             |
| 30                 | A            | 0.534             |

|    |   |       |
|----|---|-------|
| 31 | A | 0.619 |
| 32 | A | 0.693 |
| 33 | A | 0.507 |
| 34 | A | 0.411 |
| 35 | A | 0.653 |
| 36 | A | 1.004 |
| 37 | A | 1.378 |
| 38 | A | 1.546 |
| 39 | A | 0.969 |
| 40 | A | 0.653 |
| 41 | A | 0.47  |
| 42 | A | 0.626 |
| 43 | A | 0.409 |
| 44 | A | 0.45  |
| 45 | A | 0.744 |
| 46 | A | 1.937 |
| 47 | A | 1.841 |
| 48 | A | 1.144 |
| 49 | A | 0.696 |
| 50 | A | 1.172 |
| 51 | A | 2.269 |
| 52 | A | 2.321 |
| 53 | A | 2.663 |
| 54 | A | 2.831 |
| 55 | A | 3.115 |
| 56 | A | 3.312 |
| 57 | A | 2.103 |
| 58 | A | 1.18  |
| 59 | A | 0.876 |
| 60 | A | 0.66  |
| 61 | A | 0.756 |
| 62 | A | 0.992 |
| 63 | A | 0.855 |
| 64 | A | 0.584 |
| 65 | A | 0.601 |
| 66 | A | 0.842 |
| 67 | A | 0.716 |
| 68 | A | 0.979 |
| 69 | A | 1.728 |
| 70 | A | 1.729 |
| 71 | A | 1.949 |
| 72 | A | 2.029 |
| 73 | A | 1.809 |
| 74 | A | 1.648 |
| 75 | A | 2.063 |
| 76 | A | 0.814 |

|     |   |       |
|-----|---|-------|
| 77  | A | 0.631 |
| 78  | A | 0.141 |
| 79  | A | 0.088 |
| 80  | A | 0.22  |
| 81  | A | 0.21  |
| 82  | A | 0.368 |
| 83  | A | 0.394 |
| 84  | A | 0.459 |
| 85  | A | 0.768 |
| 86  | A | 1.306 |
| 87  | A | 1.699 |
| 88  | A | 0.469 |
| 89  | A | 0.361 |
| 90  | A | 0.206 |
| 91  | A | 0.448 |
| 92  | A | 0.63  |
| 93  | A | 0.493 |
| 94  | A | 0.351 |
| 95  | A | 0.179 |
| 96  | A | 0.127 |
| 97  | A | 0.143 |
| 98  | A | 0.275 |
| 99  | A | 0.264 |
| 100 | A | 0.213 |
| 101 | A | 0.201 |
| 102 | A | 0.183 |
| 103 | A | 0.196 |
| 104 | A | 0.498 |
| 105 | A | 0.572 |
| 106 | A | 0.819 |
| 107 | A | 0.803 |
| 108 | A | 1.242 |
| 109 | A | 1.497 |
| 110 | A | 0.866 |
| 111 | A | 1.619 |
| 112 | A | 0.774 |
| 113 | A | 0.401 |
| 114 | A | 0.592 |
| 115 | A | 0.684 |
| 116 | A | 0.762 |
| 117 | A | 1.448 |
| 118 | A | 0.778 |
| 119 | A | 0.684 |
| 120 | A | 0.289 |
| 121 | A | 0.153 |
| 122 | A | 0.278 |



|     |   |       |
|-----|---|-------|
| 123 | A | 0.337 |
| 124 | A | 0.776 |
| 125 | A | 0.621 |
| 126 | A | 0.559 |
| 127 | A | 0.591 |
| 128 | A | 0.611 |
| 129 | A | 0.204 |
| 130 | A | 0.097 |
| 131 | A | 0.095 |
| 132 | A | 0.185 |
| 133 | A | 0.313 |
| 134 | A | 0.243 |
| 135 | A | 0.278 |
| 136 | A | 0.285 |
| 137 | A | 0.205 |
| 138 | A | 0.081 |
| 139 | A | 0.254 |
| 140 | A | 0.233 |
| 141 | A | 0.381 |
| 142 | A | 1.177 |
| 143 | A | 1.507 |
| 144 | A | 0.794 |
| 145 | A | 0.47  |
| 146 | A | 0.376 |
| 147 | A | 0.288 |
| 148 | A | 0.432 |
| 149 | A | 0.827 |
| 150 | A | 0.924 |
| 151 | A | 0.951 |
| 152 | A | 0.396 |
| 153 | A | 0.224 |
| 154 | A | 0.17  |
| 155 | A | 0.208 |
| 156 | A | 0.667 |
| 157 | A | 0.706 |
| 158 | A | 0.759 |
| 159 | A | 0.724 |
| 160 | A | 1.369 |
| 161 | A | 0.449 |
| 162 | A | 0.388 |
| 163 | A | 0.177 |
| 164 | A | 0.443 |
| 165 | A | 0.42  |
| 166 | A | 0.444 |
| 167 | A | 1.574 |
| 168 | A | 2.589 |

|     |   |       |
|-----|---|-------|
| 169 | A | 2.649 |
| 170 | A | 1.813 |
| 171 | A | 1.98  |
| 172 | A | 0.889 |
| 173 | A | 0.647 |
| 174 | A | 0.232 |
| 175 | A | 0.105 |
| 176 | A | 0.174 |
| 177 | A | 0.204 |
| 178 | A | 0.291 |
| 179 | A | 0.179 |
| 180 | A | 0.108 |
| 181 | A | 0.159 |
| 182 | A | 0.155 |
| 183 | A | 0.31  |
| 184 | A | 1.081 |
| 185 | A | 0.98  |
| 186 | A | 0.825 |
| 187 | A | 0.452 |
| 188 | A | 0.182 |
| 189 | A | 0.291 |
| 190 | A | 0.262 |
| 191 | A | 0.29  |
| 192 | A | 0.383 |
| 193 | A | 0.478 |
| 194 | A | 0.618 |
| 195 | A | 0.541 |
| 196 | A | 0.444 |
| 197 | A | 0.566 |
| 198 | A | 0.683 |
| 199 | A | 0.863 |
| 200 | A | 1.722 |
| 201 | A | 2.825 |
| 202 | A | 3.052 |
| 203 | A | 2.738 |
| 204 | A | 2.066 |
| 205 | A | 1.389 |
| 206 | A | 1.302 |
| 207 | A | 0.991 |
| 208 | A | 0.667 |
| 209 | A | 0.454 |
| 210 | A | 0.469 |
| 211 | A | 0.388 |
| 212 | A | 0.491 |
| 213 | A | 0.296 |
| 214 | A | 0.397 |

|     |   |       |
|-----|---|-------|
| 215 | A | 0.736 |
| 216 | A | 1.296 |
| 217 | A | 0.88  |
| 218 | A | 0.795 |
| 219 | A | 0.698 |
| 220 | A | 0.698 |
| 221 | A | 0.631 |
| 222 | A | 0.86  |
| 223 | A | 1.741 |
| 224 | A | 1.952 |
| 225 | A | 1.382 |
| 226 | A | 1.056 |
| 227 | A | 0.758 |
| 228 | A | 0.541 |
| 229 | A | 0.367 |
| 230 | A | 0.223 |
| 231 | A | 0.118 |
| 232 | A | 0.127 |
| 233 | A | 0.126 |
| 234 | A | 0.412 |
| 235 | A | 0.425 |
| 236 | A | 0.623 |
| 237 | A | 0.696 |
| 238 | A | 0.763 |
| 239 | A | 0.737 |
| 240 | A | 0.511 |
| 241 | A | 0.424 |
| 242 | A | 0.498 |
| 243 | A | 0.469 |
| 244 | A | 0.51  |
| 245 | A | 0.355 |
| 246 | A | 0.792 |
| 257 | A | 3.02  |
| 258 | A | 1.113 |
| 259 | A | 0.563 |
| 260 | A | 0.537 |
| 261 | A | 0.57  |
| 262 | A | 0.731 |
| 263 | A | 0.896 |
| 264 | A | 1.386 |
| 265 | A | 1.558 |
| 266 | A | 1.77  |
| 267 | A | 2.177 |
| 268 | A | 2.267 |
| 269 | A | 2.572 |
| 270 | A | 1.656 |

|     |   |       |
|-----|---|-------|
| 271 | A | 0.999 |
| 272 | A | 0.582 |
| 273 | A | 0.468 |
| 274 | A | 0.505 |
| 275 | A | 0.466 |
| 276 | A | 0.402 |
| 277 | A | 0.393 |
| 278 | A | 0.256 |
| 279 | A | 0.361 |
| 280 | A | 0.45  |
| 281 | A | 1.779 |
| 282 | A | 1.948 |
| 283 | A | 0.714 |
| 284 | A | 0.498 |
| 285 | A | 0.39  |
| 286 | A | 0.354 |
| 287 | A | 0.56  |
| 288 | A | 0.543 |
| 289 | A | 0.499 |
| 290 | A | 0.519 |
| 291 | A | 0.605 |
| 292 | A | 0.547 |
| 293 | A | 0.562 |
| 294 | A | 0.591 |
| 295 | A | 0.721 |
| 296 | A | 0.783 |
| 297 | A | 1.036 |
| 298 | A | 0.507 |
| 299 | A | 0.378 |
| 300 | A | 1.179 |
| 301 | A | 1.03  |
| 302 | A | 0.985 |
| 303 | A | 1.856 |
| 304 | A | 0.825 |
| 305 | A | 0.776 |
| 306 | A | 0.624 |
| 307 | A | 0.677 |
| 308 | A | 0.892 |
| 309 | A | 1.241 |
| 310 | A | 1.235 |
| 311 | A | 1.676 |
| 312 | A | 1.647 |
| 313 | A | 1.424 |
| 314 | A | 1.023 |
| 315 | A | 0.725 |
| 316 | A | 0.405 |

|     |   |       |
|-----|---|-------|
| 317 | A | 0.589 |
| 318 | A | 0.793 |
| 319 | A | 1.209 |
| 320 | A | 1.302 |
| 321 | A | 1.676 |
| 322 | A | 2.72  |
| 323 | A | 2.269 |
| 324 | A | 2.258 |
| 325 | A | 1.473 |
| 326 | A | 0.935 |
| 327 | A | 0.413 |
| 328 | A | 0.358 |
| 329 | A | 0.185 |
| 330 | A | 0.458 |
| 331 | A | 0.25  |
| 332 | A | 0.368 |
| 333 | A | 0.693 |
| 334 | A | 1.31  |
| 335 | A | 0.553 |
| 336 | A | 0.544 |
| 337 | A | 0.779 |
| 338 | A | 1.772 |
| 339 | A | 2.541 |
| 340 | A | 1.735 |
| 341 | A | 1.493 |
| 342 | A | 0.91  |
| 343 | A | 0.733 |
| 344 | A | 0.664 |
| 345 | A | 0.946 |
| 346 | A | 1.133 |
| 347 | A | 1.712 |
| 348 | A | 1.242 |
| 349 | A | 0.875 |
| 350 | A | 0.566 |
| 351 | A | 0.378 |
| 352 | A | 0.417 |
| 353 | A | 0.806 |
| 354 | A | 0.984 |
| 355 | A | 0.795 |
| 356 | A | 1.11  |
| 357 | A | 1.095 |
| 358 | A | 1.412 |
| 359 | A | 1.367 |
| 360 | A | 0.902 |
| 361 | A | 0.576 |
| 362 | A | 0.249 |

|     |   |       |
|-----|---|-------|
| 363 | A | 0.119 |
| 364 | A | 0.104 |
| 365 | A | 0.127 |
| 366 | A | 0.119 |
| 367 | A | 0.248 |
| 368 | A | 0.353 |
| 369 | A | 0.872 |
| 370 | A | 1.601 |
| 371 | A | 1.662 |
| 372 | A | 1.081 |
| 373 | A | 0.555 |
| 374 | A | 0.316 |
| 375 | A | 0.363 |
| 376 | A | 0.153 |
| 377 | A | 0.139 |
| 378 | A | 0.322 |
| 379 | A | 0.292 |
| 380 | A | 0.34  |
| 381 | A | 0.456 |
| 382 | A | 0.757 |
| 383 | A | 1.016 |
| 384 | A | 1.39  |

**Supplementary Table S9: RMSF Values Profile of LY6H**

| <i>Residue No.</i> | <i>Chain</i> | <i>RMSF Value</i> |
|--------------------|--------------|-------------------|
| 26                 | A            | 1.35              |
| 27                 | A            | 0.678             |
| 28                 | A            | 0.631             |
| 29                 | A            | 1.273             |
| 30                 | A            | 0.714             |
| 31                 | A            | 0.678             |
| 32                 | A            | 0.986             |
| 33                 | A            | 1.253             |
| 34                 | A            | 1.317             |
| 35                 | A            | 1.595             |
| 36                 | A            | 1.695             |
| 37                 | A            | 1.822             |
| 38                 | A            | 1.887             |
| 39                 | A            | 1.648             |
| 40                 | A            | 1.408             |
| 41                 | A            | 1.276             |
| 42                 | A            | 1.29              |
| 43                 | A            | 0.956             |

|    |   |       |
|----|---|-------|
| 44 | A | 2.208 |
| 45 | A | 1.49  |
| 46 | A | 1.815 |
| 47 | A | 2.201 |
| 48 | A | 2.071 |
| 49 | A | 1.519 |
| 50 | A | 0.564 |
| 51 | A | 0.332 |
| 52 | A | 0.304 |
| 53 | A | 0.2   |
| 54 | A | 0.209 |
| 55 | A | 0.235 |
| 56 | A | 0.297 |
| 57 | A | 0.398 |
| 58 | A | 0.731 |
| 59 | A | 1.487 |
| 60 | A | 2.489 |
| 61 | A | 3.511 |
| 62 | A | 4.217 |
| 63 | A | 4.168 |
| 64 | A | 2.805 |
| 65 | A | 1.784 |
| 66 | A | 1.28  |
| 67 | A | 0.892 |
| 68 | A | 0.633 |
| 69 | A | 0.386 |
| 70 | A | 0.284 |
| 71 | A | 0.243 |
| 72 | A | 0.343 |
| 73 | A | 0.467 |
| 74 | A | 0.63  |
| 75 | A | 0.956 |
| 76 | A | 2.298 |
| 77 | A | 1.976 |
| 78 | A | 2.341 |
| 79 | A | 2.069 |
| 80 | A | 2.941 |
| 81 | A | 2.933 |
| 82 | A | 2.311 |
| 83 | A | 3.156 |
| 84 | A | 3.683 |
| 85 | A | 3.161 |
| 86 | A | 3.479 |
| 87 | A | 4.582 |
| 88 | A | 4.767 |
| 89 | A | 4.843 |

|     |   |       |
|-----|---|-------|
| 90  | A | 5.31  |
| 91  | A | 6.15  |
| 92  | A | 5.773 |
| 93  | A | 5.484 |
| 94  | A | 6.196 |
| 95  | A | 5.713 |
| 96  | A | 4.009 |
| 97  | A | 2.815 |
| 98  | A | 1.873 |
| 99  | A | 1.146 |
| 100 | A | 0.709 |
| 101 | A | 0.665 |
| 102 | A | 0.531 |
| 103 | A | 0.491 |
| 104 | A | 0.536 |
| 105 | A | 0.65  |
| 106 | A | 1.792 |
| 107 | A | 2.789 |
| 108 | A | 2.992 |
| 109 | A | 2.06  |
| 110 | A | 1.862 |
| 111 | A | 2.787 |
| 112 | A | 3.674 |
